# Supplementary material for: Adolescent alcohol exposure promotes mechanical allodynia and alters synaptic function at inputs from the basolateral amygdala to the prelimbic cortex
Source: eLife. 2025 May 8;13:RP101667. doi: 10.7554/eLife.101667 (PMC12061479; doi:10.7554/eLife.101667)
Supplement: Figure 1—source data 1. [file elife-101667-fig1-data1.xlsx]

## Sheet: Panels A-B
Electronic Von Frey - Paw Withdrawal Threshold
	PD 24					PD 31					PD 38					PD 45					PD 52					PD 59					PD 66					PD 73					PD 80
	Female		Male			Female		Male			Female		Male			Female		Male			Female		Male			Female		Male			Female		Male			Female		Male			Female		Male
	Air	AIE	Air	AIE		Air	AIE	Air	AIE		Air	AIE	Air	AIE		Air	AIE	Air	AIE		Air	AIE	Air	AIE		Air	AIE	Air	AIE		Air	AIE	Air	AIE		Air	AIE	Air	AIE		Air	AIE	Air	AIE
	16.9333	17.4333	12.6333	18.3667		17.6667	24.1	16.4333	13.8667		17.5667	25	29.1333	7.73333		12.9333	15.9	26.6	28.4333		11.7	20.8333	27.8667	39.6		21.2333	34.5	52.4	39.8667		40.1	34.1333	46.1667	34.6333		44.3333	28.4667	48.1333	27.2		46.0333	46.1667	47.1333	31.5333
	15.6667	19.4333	16.4667	15.2		11.5	15.1667	23.6	25.3		20.9	20.3667	31.6	18.6		33.5667	18.8667	26.1667	25.6		34.7667	14.8333	36.9	25.3		42.6333	21.6	15.9667	22.8		38.6333	51.2333	25.1333	27.1		46.6	46.7	31.6	39.9333		33.6	45.4667	29.3	40.8667
	13.6333	19.1333	16.7667	22.7333		22.6333	18.0333	22.9	21.8		19.4667	23.3667	26.6	25.4		21.8667	15.0667	16.2667	24.1667		23.4333	20.0667	33.4	14.8667		27.5333	22.7667	25.7	22.4667		29.3667	35.9667	34.9333	29.2667		26.2667	42.6333	37.4	33.9667		37.3	25.9	25.4333	17.8
	21.2	13.7	10.4333	24.2333		20.2	12.1	18.4333	29.9		28.1667	12.4667	20.3333	18.4		31.1333	21.7333	19.8667	17.4667		20.2333	15.0333	22.2333	20.6		40.7667	16.8167	23.0667	27.4667		37.9	28.1667	21.3667	23.3667		28.8	29.3333	22	17.7667		21.8	25.8333	21.9667	23.7333
	13.3333	19.9333	20.3	26.4333		33.8333	13.4333	18.5667	13.6333		27	15.0333	20.6	16.0667		40.8	27.3667	18.7667	22.9333		18.8333	30.7	22.9667	20.3333		21.1333	19.6333	29.5	46.5		18.5667	27.6333	19.5667	21.7		27.3	27.0333	19.3667	22.3		19.3667	26.7	21.3333	20.9333
	20.2	14.6333	13.6333	13.8667		19.9333	11.3333	17.8	16.8667		15.7	15.5	22.6333	22.8333		20.1333	23.9333	18.2333	23.4		22.0667	20.8	22.3333	11.0333		34.6667	23.0667	32.7333	32.1333		24.3333	22.1667	23.7333	22.7		23.4	20.7333	23.5333	22.0333		26.0333	20.8333	22.5	27.0667
	15.9	18.9667	15.2667	14.1667		12.8667	7.83333	13.7667	22.6667		16.1333	10.9333	32.1	22.1667		25.5	14.3667	13.4333	22.3333		29.2	18.7667	18.9667	27.1		21.8333	19.4667	26.3	27.5		26.8667	22	24.2333	28		24.8667	21.5667	23.7667	63.6333		21.6667	23.4333	23.6333	24.5
	16.8667	12.8333	17.7	17.7667		11.5	12.1333	16.1	21.8		18.6	19.3333	26.3333	31.2		19.2333	19.3	26.9667	22.1667		20.9667	24.6333	28.8667	24.3		15.5333	12.3333	23.3333	22		20.3667	48.5	33.5333	27.4333		26.8333	32.8333	24.9667	25.2		33.9667	19.9667	28.8667	33.4
	9.46667	15.8333	12.7333	8.66667		19.9	17.4	13.7	15.7667		13.9	17.2	10.8	25.9667		16.6	20.8667	21.4333	27.6667		14.6667	24.9333	21.2667	16.9333		50.6333	25	17.5	20.3		28.4	49.6	31.2	21.7667		31.2667	38.8333	27.1667	19.2667		14.2333	40.3	27.6	23.8667
	17.9667	10.7	8.93333	11.6333		19.9333	12.1333	6.9	11.1		26.4667	20.5	5.2	23.5667		27.3667	20.3333	8.9	20.0667		28.3333	19	13.8	21.1		38.6	24.3	13.9667	22.4667		35.0333	25.0667	23.4	22.5333		34.3333	28.9	29.4667	29.9		40.4667	18.2333	31.0333	30.8
	12.7667	8.36667	13.9667	17.7		19.7667	9.9	18.7333	15.6		22.8333	25.1	18.5	24.4		19.4333	24.9333	22.0667	27.8333		25	22.1333	30.2667	25.0667		41.4333	15.5667	43.5667	37.5		36.5667	29.2667	31.1	33.3		33.1	25.6	42.9667	30		46	35.4667	34.5333	32.5667
	12.1	17.9333	9.93333	14.6		21.3667	24.7667	14.9333	16.5		14.2667	17.1	15.7	29.5667		14.7282	24.7333	22.4667	30.8134		15.1	34.5333	22.1667	32.1121		15.8333	40.8667	46.1	33.2		23.0333	25.5333	44.2667	34.8667		24.6	31.2333	46.5	34.4333		12.9667	37.1667	47.9	43.9333
	9.6	10.7667	20.9333	14.0333		22.2333	18.0667	30.9333	15.0667		23.4667	18.4	29.8667	19.8		33.4667	32.5333	31.5338	18.3		46.6133	36.6667	25.8333	13.0333		30.6	30.0333	49.6	24.2667		38.0333	34.8667	24.7333	43.3333		41.0333	25.7333	35.8667	27.6		38.7	23.7667	46.8667	34.1333
	18.4333	19.2333	20.5333	11.5667		17	17.5	19.0667	26.8		18.1	12.4667	23.4667	20.0667		19.7333	19.9667	29.9	16.4		33.2	28.9	39.5	26.8667		33.9667	37	37.6667	59.5333		28.9333	32.9333	44	24.0667		45.3	22.4667	46.3333	23.8667		48.3333	27.7	31.2	30.4667
	19.1333	14.6667	13.1667	11.4333		30.1333	26.3333	17	16.9		24.0667	16.3667	25.8667	24.7667		28.5667	21.1667	27.3	28.9333		35.1667	28.2	32.1333	28.5		39.5667	24.7667	39.0667	30.9667		29.5	16.9333	31.4333	43.3333		32.9667	43.1667	41.4333	38.9667		31.1667	25.3333	43.7667	38.6667
	9.16667	9.73333	21.7	9.53333		22.9333	25.2667	24.3	22.5		31.5333	24.1333	38.8333	23.7333		28	22.2	52.5667	28.4667		32.2333	23.4667	36.5	22.6333		34.4667	43.8667	41.8333	29.7		30.3	33.8	29.8667	37.3333		28.6333	28.8333	65.7667	40.5333		27.8	46.0667	50.2667	41.8333
	12.1667	18.5667	20.4	15.1333		22.8667	24.6333	20.4667	20.5333		20.1333	20.0667	33.3333	22.7667		22.2333	30.6333	30.1333	36.9333		39.9333	27.5	34.2333	27.0667		25.6	30.8667	39.8667	25.2667		18.2667	13.8	42	40.1333		39.2	26.2333	45.6	30.4		25.7333	31.3333	60.7667	31.6
	10.0667	12.3333	13.5667	17.1667		27.3333	18.4	23.1333	24.3333		25.7667	21.3667	36.4333	36.6		26.8333	26.5667	35.8667	29.5333		34.1667	22.7	33.0333	24.2		22.0667	33.2333	47.9667	38.2667		31.9667	38.8333	44.0333	36.5		30.7667	29.4333	47.0667	69.8667		23.7	34.4333	59.6	40.1
	12.7	14.3333	13.6667	15.7333		22.5667	24.8	18.9667	14.8667		23.9667	23.5667	21.3333	16		37.1	34.2667	35.8333	20.9		31.9	26.3667	47.4333	27.5667		25.3667	37.1	58.7667	38.5		31.8	27.1333	41.2333	29.3333		43.4333	25.9333	52.7333	36.9667		35.1667	50	72.9	46.0333
	22.7667	18.8667	22.3	19.9333		22.8667	13.2667	27.8333	19.5		32.6	10	29.4	21.8667		39.1667	22.2667	37.8333	24.3333		32.9	30.2	23.8	30.5333		31.4333	21.1	38.7	41.9		43.5	28.7333	41.4	52.7667		44.0333	36.3667	58.9	37.3667		39.9333	24.7333	64.3667	47.6333
	17.6	15.2667	16.4	17.5667		26.1	18.8333	17.0667	22.5333		32.6	11.4	17.5	27.5		34.0333	8.33333	39.0667	30.2667		25.8	24.5667	42.8	36.3667		25.8	26.5667	40.2333	28.1333		34.9667	26.4167	43.1	27.1		49.9	26.2667	45.9667	29.3667		53.5	36.2667	40.1333	25.5667
	6.2	12.5333	18	17.9333		24.6667	23.5	23.0333	23.3833		22.9667	28.2333	25.6	28.8333		25.0333	32.8	33.7333	13.1333		34.9	32.7667	31.8	26.6667		18.3667	34.7833	48.3333	28.9667		38.0667	36.8	42.1333	29.3833		29.7	33.1667	35.9333	29.8		34.1	27.8333	36.2667	33.4333
	16.6333	15.9333	12.9	24.5		19.5333	14.1667	24.0333	23.1		18.0667	11.5333	34.2667	21.7		17.9	40.4667	27.0333	29.4333		28.2	38.7	37.5	22.3		42.7	34.4667	39.85	30.3333		38.25	30.2333	42.2	34.9167		33.8	35.4667	56.9	39.5		21.2333	37.3667	36.9333	37.3333
	15.2333	20.5333	21.0333	24.1		27.8333	20.3	23.3333	23.8167		31.1333	21.5667	22.4	23.5333		25.8333	26.5	30	30.4667		25.7667	31.6667	36.7667	25.3667		25.9833	31.4667	33.2667	33.5667		26.2	31.2667	29.7667	31.95		52.7333	44.2667	50.1667	30.3333		42.0333	27.7	47.1333	32
	16.3667	16.2667	21.6333	19.8667		21.4667	22.1667	21.05	21.3667		15.3333	25.2667	20.4667	22.8667		29.0667	26.6	12.7	28.6		23.2667	33.3333	28.1333	22.6		27.8833	35.85	43.5667	25.8667		32.5	38.3667	35.0333	23.3167		35.4667	45.3333	25.7	20.7667		34.1333	42.4333	20.4	24.8
	17.7667	19.0667	23.9667	31.2667		16.8667	20.2833	34.6333	27.65		21.7	21.5	45.3	24.0333		27.6667	21.4667	35.6833	22.9667		32.4	26.8167	26.0667	24.8667		36.9167	32.1667	34.0667	10.2		41.4333	36.7667	40.1	16.0333		42.3667	23.5667	28.8	21.8667		34.7667	20.4333	29.3	22.7
	37.9	10.9667	23.7333	20.3667		42.15	23.1167	27.7333	20.3667		46.4	35.2667	31.7333	18.3		44	55.6333	31.2333	19.7667		41.6	35	30.7333	27.9		20.9667	14.3667	33.3333	36.0333		35.1333	23.1333	35.3	35.2667		32.6	28.1333	22.1667	31.4667		32.1667	18.3	26.7	29.1
	23.4333	23.4333	30.2333	29.6		23.9	21.9	35.4	29.6		24.3667	20.3667	40.5667	24.1667		23.1833	23.7333	32.7	20.8667		22	38.7	24.8333	24.4		32.8333	21.9	45.6333	27.9333		28.3333	21.2333	48.1667	34.6333		27.4333	37.4	26.6333	36.0667		30.9333	21.3667	34	33.7667
	30.3	19.8	21.3	23.2333		33.6167	23.55	28.2	23.2333		36.9333	27.3	35.1	27.0667		27.4	13.1333	39.4333	21.8		17.8667	22.4667	43.7667	26.7333		22.4	23.2333	41.5667	31.6667		18.4	27.3333	54.1	31.3667		21.1333	49.7333	33.8	31.4		21.8333	28.4333	32.3667	30.4667
	41.9667	31.2	35.7333			34.9833	27.3	34.1833			28	23.4	32.6333			26.0267	30.5	40.65			24.0533	26.5	48.6667			23.2333	27.5333	41.1333			50.7	26.6167	44.9			29.5667	25.7	29.7			27.9333	24.3333	26.5333
Mean	17.4489	16.4133	17.9989	18.2184		23.005	18.7239	21.7411	20.7017		23.9378	19.8033	26.7878	23.0862		26.6179	24.5389	28.1456	24.62		27.5422	26.6928	30.8189	24.6878		29.7328	27.2072	36.8195	30.8724		31.8483	30.8156	35.7378	30.946		34.3922	32.0356	37.5444	32.4747		31.8867	30.4433	37.3578	32.0908
SEM	1.43632	0.850077	1.08402	1.06818		1.2597	1.00635	1.21829	0.914714		1.34442	1.0776	1.61516	0.995372		1.40366	1.64456	1.76083	0.978272		1.52025	1.19806	1.55826	1.13644		1.65157	1.48266	2.01815	1.73182		1.44489	1.61743	1.66739	1.47857		1.55195	1.48254	2.28331	2.13934		1.82899	1.6823	2.54329	1.42253
Count	30	30	30	29		30	30	30	29		30	30	30	29		30	30	30	29		30	30	30	29		30	30	30	29		30	30	30	29		30	30	30	29		30	30	30	29

## Sheet: Panels D,E
Hargreaves Test - Paw Withdrawal Latency
	PD 24					PD 31					PD 38					PD 45					PD 52					PD 59					PD 66					PD 73					PD 80
	Female		Male			Female		Male			Female		Male			Female		Male			Female		Male			Female		Male			Female		Male			Female		Male			Female		Male
	Air	AIE	Air	AIE		Air	AIE	Air	AIE		Air	AIE	Air	AIE		Air	AIE	Air	AIE		Air	AIE	Air	AIE		Air	AIE	Air	AIE		Air	AIE	Air	AIE		Air	AIE	Air	AIE		Air	AIE	Air	AIE
	7.9	3.73333	5	8.23333		9.5	4.26667	6.53333	6.06667		14.9333	10.4333	12.0667	4.96667		7.7	11.1667	10.1667	11.4667		12.5333	9.9	10.6667	8.7		9.86667	13.3	13.2333	6.8		11.1	9.16667	11.8	10.0667		9.13333	11.7667	8.06667	15.9667		8.93333	9.56667	7.23333	16.7
	9.03333	6.6	6.4	6.76667		7.56667	9.4	6.8	3.53333		13	4.8	10.9333	11.8		8.9	12.1667	7.63333	10.4333		10.8	8.86667	8.7	7.83333		10.2333	8.16667	16.6333	6		12.3667	7.9	14.0333	11.6333		11.1333	9.3	11.3333	14.8		9.7	5.66667	10.9333	13.8
	10.2	11.3333	7.6	11.9333		6.66667	7.3	9.1	12		11.5667	13.2333	5.96667	11.7		9.76667	10.5	9.6	9.9		6.9	12.4	8.46667	8.96667		17.0667	12.3333	13.0333	12.5		13.1333	11.3	14.5	8.26667		15.6	14.1	13.6	13.7667		12.4333	13	10.6	10.4
	6.73333	5.83333	20.9	9.43333		7.7	10.3333	12.9333	13.9333		10.2	10.1	14.7	9.53333		10.6667	9.16667	11.9333	6.53333		11.5	9.76667	14.9667	7.96667		15.8667	8.43333	10.2333	15.0333		14.8333	10.7	11.9333	8.7		12.1333	11.4667	13	10.7		11	12.0667	11.8333	12
	10.6333	7.76667	11.0333	10.4667		5.43333	11.3333	7.23333	7.06667		13.2333	10.2333	12.1667	10.1667		13.6667	5.83333	10.8	8.96667		12.4	7.7	10.0667	10.9333		12.4667	9.53333	7.9	12.4667		12.6	8.06667	11.5333	8.6		16.9	10.1667	10.2	11.6667		11.9333	11.2667	11.3333	11.3
	14.1333	5.26667	10.5	9.03333		9.26667	6.43333	12.9333	9.2		12.1333	9.03333	10.0667	9.96667		10.4	8.96667	10.9333	7.43333		10.7333	11.3667	7.9	7.75		8.03333	6.46667	13.2333	12.8333		11.0667	10.4333	11.3333	10.6333		11.2667	11.1333	11.7	12		13.2333	11.6	12.1	12.3
	7.7	9.46667	12.8333	11.8333		7.33333	6.4	9.26667	15.2667		10.2667	7.93333	11.1	5.86667		11.6333	9.33333	13.1667	11.9667		8.13333	11.6	13.2	13.1667		12.9667	12.7	13.6333	12.6333		10	12.5333	13.1333	12.5667		9.93333	13.9	12.8	17.9333		10.8333	13.0667	12.9333	15.7333
	11.8333	10.5667	14.8667	12.6		7.83333	10.9333	15.5667	13.4667		9.26667	11.6333	16.9667	17.5667		11.1667	11.8	15.1667	12.9333		11.2	12.4	15.0667	13.2		12.6667	14.2333	14.6667	13.5333		13.88	13.8	13.7667	13.2333		13.3667	10.7	11.4667	14.4		15.6	13.2333	13.0333	14.8667
	8.23333	10.0667	16.1	8.66667		17.8667	9.93333	10.7667	7.36667		14.2333	12.8333	11.4667	13.9		9.93333	9.46667	12.6667	12.3		15.9	11.6	14.7333	11.4667		13.1333	9.23333	15.3667	12.4667		14.7333	11.1667	11.3333	11.1		9.53333	12.7667	11.1	13.0333		16.3	11.9667	11.4333	13.5
	11.4667	8.66667	7.93333	8.33333		12.0333	10.8333	4.7	8.76667		11.2667	17.3667	5.9	13.5333		9.7	12.9	6.33333	14.0667		14.9333	10.7667	10	13.6333		11.3	9.26667	9.96667	12.1		8.96667	9.7	9.63333	13.6667		11.0667	8.9	11.4	14.2333		4.43333	10.7667	12.3333	14.0333
	5.83333	10.1667	13.2667	10.3		10.9333	4.1	11.8667	9.36667		12.2667	13.5667	15.2667	9.66667		14.7	10.9333	16.2	9.8		14.4	9.53333	12.6333	10.9667		16.3	10.5	17.1	12.9		8.1	7.6	16.2333	11.2333		7.63333	12.9667	23.0333	12.5333		8.9	7.8	18.8667	14.6667
	6.73333	2.53333	13.6	5.76667		11.5333	6.83333	11.5	6.96667		13.4667	5.2	11.7333	8.06667		14.3094	10.1	9.63333	8.7358		18.1	11	16.1	9.0755		10.1	9.96667	11.9667	10.7333		16.1333	8.7	12.2333	8.76667		11.0333	13.4	15.3	7.2		13.8	10.3	10.2333	12
	7.2	7.93333	9.23333	4.6		14.0333	13.6667	6.16667	12.1333		7.56667	8.8	13.2333	10.7		7.46667	6.93333	11.4472	7		11.7333	16.2333	10.4333	7.5		16.7	10.2667	6.33333	10.8667		13.7667	9.3	9.23333	6.5		13.9667	11.0667	12.3667	9.83333		16.2	12.0667	10	7.56667
	5.8	5.46667	7.46667	5.3		18.9667	11.1	10.9	13.0667		6	11.6333	9.93333	11.9333		6.7	8.4	9.1	11.7333		9.63333	12.4	8	10.5333		9.13333	11.3333	7.7	9.3		9.93333	10.5333	6.33333	11.1333		12.3667	8.13333	11.4667	8.26667		13.5	11.3667	12.7667	7.43333
	7.83333	2.33333	3.83333	10.4		11	6.96667	15.2667	9.73333		8.23333	9.06667	12	9.93333		7.1	14.6667	9.26667	10.2667		9.26667	7.5	10.4333	8.76667		5.66667	12.5333	7.46667	11.6667		12.3	10.1	10.8	10.6333		10.1	10.1333	8.76667	9.23333		10.2333	8.26667	7.9	9.33333
	2.66667	5.13333	10.1667	7.13333		7.66667	7.86667	14.6667	5.5		11.4	9.43333	8.06667	4		12.7	9.73333	6.66667	5.53333		13.2333	3.63333	6.5	7.86667		13.8333	5.83333	6.53333	5.23333		9.73333	6.93333	7.96667	8.86667		10.5	5.96667	8.16667	9		9.76667	10.0667	8.73333	7.53333
	9.36667	5.7	8.26667	11.7333		11.6	6.76667	8.33333	7.1		12.7333	14.2333	10.9333	5.6		8.63333	6.7	8.66667	5.06667		13.3333	8.66667	8.53333	5.03333		9.1	9.1	6.3	6.53333		16.8333	13.6	10.6	7.56667		11.4333	11.1	10.0333	8.43333		14.4333	11.8	10.6	4.1
	6.86667	7.16667	6.2	8.5		10.6667	11.8	6.23333	16.9		9.83333	10.8333	6.83333	6.73333		18.1	12	9.4	10.0333		8.43333	11.6	7.5	6.36667		8.9	11.7667	10.1333	8.46667		10.7333	11.4	6.76667	10.2333		10.9333	10.0333	4.2	8.26667		9.66667	9.36667	6.76667	6.7
	7.3	7.16667	8.4	5.6		6.13333	10.9667	3.93333	5.3		8.6	11.8667	8.2	6.96667		8.86667	12.7667	7.46667	8		10.8333	3.93333	7.53333	9.33333		10.4667	9.93333	6.26667	7.26667		6.26667	12.5667	9.5	8.06667		9.7	8.8	6.36667	6.5		10.2	10.5667	7.46667	7.1
	7.93333	14	7.63333	8.3		4.66667	9.63333	7.56667	10.8667		6.76667	11.6333	8.36667	8.2		9.86667	13.5333	7.2	13.6333		10.4	7.33333	8	6.7		10.5667	8.06667	5.76667	6.46667		8.06667	9.78333	5.53333	9.8		8.3	11.5	6.66667	7.03333		9.96667	8.1	10.4333	8.93333
	9.4	8.96667	8.3	7.8		4.8	7.93333	11.5667	8.66667		6.63333	10.3667	6.2	9.53333		8.93333	7.6	8.06667	8.66667		9	10.7667	9.56667	10.6333		10.7333	9.5	7.83333	10.6		14.4	8.68333	8.86667	11.2		9.23333	7.86667	9.9	9.16667		11.3333	9.73333	7.43333	8.76667
	9.63333	9.8	9.13333	12.0667		11.3333	5.2	8.96667	13.6333		8.43333	6.43333	9.9	15.2		6.13333	10.5333	7	9.3		11.1333	4.16667	10.3667	12.5		13.1333	6.55	8.46667	13.8667		13.9333	8.93333	7.3	14.1167		10.9333	7.2	6.13333	14.3667		11.7333	9.9	5.76667	13
	7.86667	9.36667	8.26667	8.4		5.56667	7.76667	9.33333	9.26667		3.5	11.5	8.4	10.1333		10.3667	6.83333	5.86667	15.6667		9.1	10.2667	7.46667	10.8667		8.13333	7.56667	6.38333	8		8.68333	4.86667	5.3	7.78333		9.23333	9.73333	5.73333	7.56667		5.73333	9.93333	12.1667	9.76667
	9.3	7.5	5.7	5.3		9.76667	12.1	11.6667	6.66667		10.6333	7.86667	9.96667	8.03333		14.5	8.8	10.6	6.86667		9.56667	7.3	8.96667	9.26667		8.88333	8.41667	7.58333	9.16667		8.2	9.53333	6.2	8.88333		8.23333	9.36667	6.2	8.6		10.5667	12.1	6.46667	9.26667
	8	8.63333	5.56667	15.7		10.8333	10.6	7.23333	15.0333		10.2333	7.2	8.9	14.3667		10.6667	9.03333	8.73333	10.2333		8.96667	6.76667	8.95	11.8667		8.06667	7.6	9.16667	9.4		7.16667	8.43333	8.46667	12.4		9.96667	8.33333	9.56667	15.4		11.0667	9.4	10.5	14.8667
	9.33333	4.53333	9.63333	11		10.6667	5.81667	7.7	10.9833		11.9667	7.1	5.76667	10.9667		11.5333	10.1667	8.68333	9.06667		11.2333	13.9167	11.6	11.6333		11.3167	17.6667	11.5667	12.3333		11.4	19.6333	4.63333	12.2833		12.2333	13.0333	6.03333	12.2333		10.3333	10.7333	7.83333	12.2
	9.5	10.9667	10.5333	11.6667		10.55	10.95	9.38333	11.6667		11.6	10.9333	8.23333	10.7333		13.5667	10.5333	11.9	9.06667		15.5333	11.2167	15.5667	9.73333		12.9667	11.9	10.7667	10.4		11.8	13.0333	8.73333	11.0667		10.3667	10.2	9.16667	11.5667		9.8	8.66667	9.6	12.5333
	4.93333	11.1	6.33333	3.73333		7.23333	13.2333	7.38333	3.73333		9.53333	15.3667	8.43333	9.33333		11.2	16.1667	8.78333	8.56667		12.8667	7.63333	9.13333	9.16667		18.3	7.26667	8.73333	9.76667		11.0333	9.06667	6.6	10.3667		10.8	11.6	7.26667	10.1		9.7	12.7333	9.96667	10.3
	6.96667	5.76667	5.73333	8.23333		9.93333	10.55	7.58333	8.23333		12.9	15.3333	9.43333	8.9		14.7167	11.6667	10.6833	8.26667		16.5333	12.4667	11.9333	9.36667		16.1667	11.7333	9.3	10.4667		13.0667	11.8667	14.9333	10.9333		12.0667	12.6667	13.0667	10.7		10.7333	11.3667	11.9667	10.9333
	8.26667	11.1667	9.1			8.81667	11.2333	10.5			9.36667	11.3	11.9			10.5167	10.3333	11.0167			11.6667	12.4	10.1333			10.3333	11.9667	7.76667			13.1333	11.1167	16.9667			13	10.2667	16.2333			12.2333	11.0333	14.5
Mean	8.28666	7.82334	9.31778	8.92529		9.59666	9.075	9.45278	9.70632		10.3922	10.5755	10.1011	9.93103		10.8037	10.2911	9.82602	9.70698		11.6667	9.83667	10.4372	9.68249		11.7467	10.1044	10.0344	10.3379		11.5788	10.3483	10.2067	10.3552		11.07	10.5856	10.3444	11.1897		11.1433	10.5833	10.4578	11.0908
SEM	0.402963	0.516577	0.67385	0.517588		0.614641	0.479163	0.549403	0.658923		0.482306	0.546167	0.511919	0.580362		0.507127	0.435052	0.451106	0.470941		0.490887	0.538732	0.494067	0.398697		0.575392	0.47644	0.602791	0.489788		0.492062	0.48963	0.614216	0.356927		0.377349	0.369774	0.701807	0.564341		0.482241	0.32116	0.500717	0.574625
Count	30	30	30	29		30	30	30	29		30	30	30	29		30	30	30	29		30	30	30	29		30	30	30	29		30	30	30	29		30	30	30	29		30	30	30	29

## Sheet: Panels C,F
Average Mechanical and Thermal Sensitivity PD 31 - PD 80
	Electronic Von Frey					Hargreaves test
	Female		Male			Female		Male
	Air	AIE	Air	AIE		Air	AIE	Air	AIE
	26.4458	28.6375	36.7333	27.8583		10.4625	9.94584	9.97084	10.0917
	32.775	29.2792	27.5333	28.1875		10.4625	8.28334	10.875	9.97916
	25.9833	25.475	27.8292	23.7167		11.6417	11.7708	10.6083	10.9375
	28.625	20.1854	21.1583	22.3375		11.7375	10.2542	12.6917	10.55
	25.8542	23.4417	21.3333	23.05		12.3292	9.26667	10.1542	10.1458
	23.2833	19.7958	22.9375	22.2583		10.7667	9.42916	11.275	10.2646
	22.3667	17.2958	22.025	29.7375		10.1375	10.9333	12.4042	13.1417
	20.875	23.6292	26.1208	25.9375		11.8725	12.3417	14.4625	14.15
	23.7	29.2667	21.3333	21.4417		13.9542	11.1208	12.3583	11.8917
	31.3167	21.0583	16.5833	22.6917		10.4625	11.3125	8.78333	13.0042
	30.5167	23.4958	30.2167	28.2833		11.6542	9.625	16.4	11.3917
	17.7369	29.4917	32.5042	31.9282		13.5595	9.4375	12.3375	8.94308
	34.2683	27.5083	34.4042	24.4417		12.6792	11.0417	9.90173	9.0125
	30.5708	24.8667	33.8917	28.5084		10.7792	10.6125	9.52501	10.425
	31.3917	25.2833	32.25	31.3792		9.2375	9.90416	10.2375	9.94584
	29.4875	30.9542	42.4917	30.8417		11.1042	7.43334	8.41251	6.69167
	26.7458	25.6333	38.3	29.3375		12.2625	10.2458	9.24999	6.17917
	27.825	28.1208	40.8917	37.425		10.9083	11.1	7.22916	9.21249
	31.4125	31.1458	43.65	28.7708		8.88333	10.175	7.09167	7.31667
	35.8042	23.3333	40.2792	34.4875		8.57501	9.94791	7.44166	8.95417
	35.3375	22.3313	35.7333	28.3542		9.38332	9.05626	8.67917	9.65416
	28.475	31.2354	34.6041	26.7		10.8458	7.36458	7.9875	13.2479
	27.4604	30.3	37.3396	29.8271		7.53959	8.55834	7.58125	9.88126
	32.1896	29.3417	34.1042	28.8792		10.0437	9.43542	8.45625	8.34375
	27.3896	33.6688	25.8813	23.7729		9.62084	8.42083	8.93958	12.9458
	31.7646	25.375	34.2438	21.2896		11.3354	12.2583	7.97709	11.4625
	36.8771	29.1187	29.8666	27.275		12.0229	10.9292	10.4188	10.8458
	26.6229	25.825	35.9917	28.9292		11.3333	11.6333	8.2875	8.91667
	24.9479	26.8979	38.5417	27.9667		13.2646	12.2063	11.1125	9.725
	30.5621	26.4854	37.3			11.1333	11.2063	12.3771
Mean	28.6204	26.2826	31.8691	27.435		10.9997	10.175	10.1076	10.2501
SEM	0.820316	0.70852	1.30941	0.726504		0.268346	0.24665	0.407037	0.357954
Count	30	30	30	29		30	30	30	29
