# Supplementary material for: Adolescent alcohol exposure promotes mechanical allodynia and alters synaptic function at inputs from the basolateral amygdala to the prelimbic cortex
Source: eLife. 2025 May 8;13:RP101667. doi: 10.7554/eLife.101667 (PMC12061479; doi:10.7554/eLife.101667)
Supplement: Figure 2—source data 1. [file elife-101667-fig2-data1.xlsx]

## Sheet: Panels A-B
Baseline mechanical and thermal sensitivity at approximately PD 109
	Electronic Von Frey					Hargreaves test
	Female		Male			Female		Male
	Air	AIE	Air	AIE		Air	AIE	Air	AIE
	30.0333	31.6667	61.7333	30.1333		10.8667	15.2	24.8333	14.8667
	35.1667	18.4667	43.2667	39.8967		12.6667	14.1333	7.66667	14.9
	54.4667	28.5667	42.3	43.2667		21.5333	12.2333	7.76667	20.7333
	20.2	20.7667	51.7667	38.9		22.1667	12.9	10.7	12.4
	35.2333	51.6333	29.2333	33.8333		15	10.8667	17.6	8
	34	18.3667	42.1333	44.6		16	7.36667	8.2	13.4333
	31.1667	48.8333	61.9333	54.9333		13.1	14.4333	14.0333	8.66667
	44.3333	61.9333	67.2333	47.6		17.2667	11.4333	7.7	4.53333
	50.5667	25.2	53.5667	57.7667		7.4	12.2333	4.13333	7.36667
	60.8667	55.4	53.3667	41.4		7.56667	8.3	8.13333	14.6333
	44.7333	42.5667	44.7667	53.1333		10.2667	7.56667	5.13333	7.43333
	51.8333	40.1333	48.1333	59.1667		9.1	16.5	7.63333	6.46667
	54.7333	46.2667	60.8333	42.1333		10.0333	10	12	7.16667
	45	51.9667	48.4667	42.4667		14.3333	9.6	10.2667	17.2
	46.9	33.8667	65.4667	22.2667		15.2333	13.3333	15.4667	11.4
	33.4333	36.4667	47.2	38.9667		11.1333	12.2	18.5	8.13333
	46.1333	39.4333	42.4667	41.2		12.2667	15.5667	17.2	11.3667
	16.6333	22	51.7667	39.7		16.2333	10.9333	11.5667	10.2333
	53.3333	44.4	45.3	42.3333		10.3333	9.56667	14.0333	8.86667
	39.4667	47.3333	42.4333	44.0667		16.1333	10.4667	18.8667	15.5667
	33.1333	23.0667	41.1	51.5333		11.6333	12.1333	9.66667	8
	39.8333	48.1333	47.1667	53.6667		10.3667	13.3333	19.4333	4.8
	55.1667	55.8333	42.3	45.0333		10.4667	12.2333	12.1333	5.66667
	22.2	42.8	53.5333	58.5		9.93333	13.8333	6.9	8.46667
	39.4667	49.7667	55.5667	35.9		7.56667	13.4	15.7	9.43333
	44.9	41.6	54.9667	49.45		11.2333	7.4	11.0333	7.16667
	57.3	44.0667	70.3333			9.8	5.8	10.8333
	52.5333	41.6	49.6667			10.0333	11.7667	4.23333
	49.8		58			7.6		8.73333
	51.4667					6.26667
Mean	42.4678	39.7191	50.8966	44.3018		12.1178	11.5976	11.7276	10.2654
SEM	2.09078	2.30461	1.72199	1.74033		0.719764	0.506961	0.942888	0.805535
Count	30	28	29	26		30	28	29	26

## Sheet: Panels C, E, G, I
Mechanical and thermal sensitivity following treatment with saline or carrageenan. Expressed as percent baseline. See Panels A-B tab for baseline.
	Electronic Von Frey									Hargreaves test
	Female				Male					Female				Male
	Air		AIE		Air		AIE			Air		AIE		Air		AIE
	Saline	Carrageenan	Saline	Carrageenan	Saline	Carrageenan	Saline	Carrageenan		Saline	Carrageenan	Saline	Carrageenan	Saline	Carrageenan	Saline	Carrageenan
	52.6089	37.3659	78.6411	41.0877	118.715	64.9748	111.957	38.1268		110.579	43.9673	99.4536	48.1725	89.4896	50.0224	62.7261	21.6741
	65.5347	44.9921	61.0313	80.585	111.957	28.7879	127.845	56.5628		76.4493	33.8597	59.172	59.9843	62.7261	46.9565	87.7195	46.4579
	96.5263	34.9857	111.667	32.8666	58.7036	35.5923	97.063	51.6179		99.3155	38.4417	95.0203	43.0518	108.646	74.8212	105.738	37.7278
	68.3951	46.9747	91.1913	61.0487	95.6096	51.8781	96.3592	73.2077		90.4301	25.8146	92.7991	45.478	107.601	55.6594	82.698	64.9641
	62.6126	65.2791	71.7136	25.8446	124.509	30.8628	113.91	62.4959		63.843	32.5185	100.212	46.319	97.6444	35.6692	67.861	60.1532
	84.3058	44.5752	102.168	40.8953	80.3188	62.3418	95.3282	59.8904		103.439	61.3889	63.7363	77.1392	61.954	74.1194	96.3658	38.7924
	78.8565	56.0428	64.1505	52.5825	81.0836	53.8931	63.5195	33.1917		83.1726	57.9306	95.6667	34.565	79.4168	36.1045	105.924	36.9231
	73.4944	37.4687	67.6417	39.756	79.4853	55.5198	106.36	83.9402		81.3694	34.3629	100.273	42.5656	84.3408	51.5873	104.444	92.4021
	67.7177	42.5181	81.0748	68.0335	80.988	73.8849	78.6025	48.2978		88.0313	85.5857	54.9398	60.8538	122.705	86.5591	114.583	46.4555
	74.3243	62.678	73.0074	26.414	83.7033	53.3	52.6277	53.5695		96.6226	62.0411	74.5025	61.4458	75.5131	42.3497	86.2745	29.7646
	87.0082	55.8371	49.6909	24.615	88.6597	58.5257	56.6952	44.6989		90.6034	31.0606	85.8108	67.4008	68	66.4502	97.3754	75.5605
	41.8654	51.3183	100.53	66.639	71.2638	32.1791	97.4467	40.8075		90.3628	63.8584	117.816	36.9697	57.7436	94.4777	96.6431	56.1856
	81.5356	38.1445	95.8733	35.4467	55.1901	42.5023	69.8011	33.9663		109.524	44.9612	84.8441	90.6667	88.9764	36.3889	109.767	38.3721
	76.9076	41.605		41.6506	91.1303	41.2884				118.421	57.5969		46.5278	97.4554	41.8831
	71.1356	59.4172		31.4304		30.3971				125.532	47.7024		36.75		25
Mean	72.1886	47.9468	80.6447	44.593	87.2369	47.7285	89.8089	52.3364		95.1797	48.0727	86.4805	53.1927	85.8723	54.5366	93.7015	49.6487
SEM	3.51423	2.54924	5.12063	4.47164	5.43295	3.69048	6.54001	4.1818		4.24109	4.22741	5.14577	4.15488	5.24808	5.27867	4.36499	5.45043
Count	15	15	13	15	14	15	13	13		15	15	13	15	14	15	13	13

## Sheet: Panels D, F, H, J
Mechanical sensitivity (electronic Von Frey) following treatment with saline or carrageenan at 2, 6, and 24 hr postinjection. Expressed as percent baseline. See Panels A-B tab for baseline.
	2 hr									6 hr									24 hr
	Female				Male					Female				Male					Female				Male
	Air		AIE		Air		AIE			Air		AIE		Air		AIE			Air		AIE		Air		AIE
	Saline	Carrageenan	Saline	Carrageenan	Saline	Carrageenan	Saline	Carrageenan		Saline	Carrageenan	Saline	Carrageenan	Saline	Carrageenan	Saline	Carrageenan		Saline	Carrageenan	Saline	Carrageenan	Saline	Carrageenan	Saline	Carrageenan
	40.9771	33.4073	74.0402	38	119.774	90.7127	142.465	39.2699		51.0469	48.7236	70.9324	42.8421	138.63	49.0281	109.969	0		65.8026	29.9667	90.9506	42.4211	97.7401	55.1836	83.438	75.1106
	61.9942	69.0995	43.4489	102.76	142.465	22.1109	149.551	57.9831		55.9249	22.8436	54.8605	42.4628	109.969	35.6703	108.234	40.6049		78.685	43.0332	84.7844	96.5322	83.438	28.5824	125.749	71.1003
	75.5511	65.7895	120.152	57.7596	35.7373	39.5587	80.4106	19.3374		85.3707	11.5667	128.939	14.5858	87.0573	19.6217	97.8614	65.4854		128.657	27.601	85.9091	26.2544	53.3162	47.5965	112.917	70.0308
	111.735	50.33	111.712	44.9438	106.917	75.0161	111.974	74.9786		50.7602	56.1056	76.5766	41.573	88.3002	19.3818	103.479	31.8766		42.6901	34.4884	85.2853	96.6292	91.6115	61.2363	73.6246	112.768
	53.2939	91.0123	53.7324	23.3699	123.095	42.8734	114.358	49.2611		58.5304	42.7625	71.6901	16.9141	158.916	26.3398	114.106	46.8966		76.0135	62.0624	89.7183	37.2498	91.5161	23.3751	113.266	91.33
	88.2294	48.0392	91.0405	20.8711	72.6683	60.5222	63.1496	60.9118		85.6137	34.7059	77.8902	20.8711	63.1792	57.3576	119.213	40.583		79.0744	50.9804	137.572	80.9437	105.109	69.1456	103.622	78.1764
	63.7657	65.8824	33.8643	78.6348	66.6431	53.4984	66.2234	33.1917		71.1297	29.6257	70.8449	29.6246	114.841	51.507	47.3404	33.1917		101.674	72.6203	87.7424	49.4881	61.7668	56.6738	76.9947	33.1917
	81.4501	81.7293	100.955	39.0743	41.5288	72.0129	78.5899	82.0728		62.9003	10.9023	45.4925	24.7578	82.0331	44.0258	124.838	82.2829		76.1329	19.7744	56.4776	55.436	114.894	50.5206	115.653	87.465
	97.2973	71.7864	63.6293	76.7196	69.7385	41.3192	53.354	45.9896		77.1772	25.0494	81.0748	56.8783	81.6936	75.8556	78.6025	42.0081		28.6787	30.7185	98.5202	70.5026	91.5318	104.48	103.851	56.8956
	68.2432	84.8028	77.562	43.0205	79.6041	73.5166	27.6092	56.8438		73.0574	69.6057	73.0074	13.3574	89.3221	50.7183	41.6728	61.9163		81.6723	33.6254	68.4528	22.864	82.1836	35.6652	88.601	41.9485
	77.3571	91.3562	41.791	20.2819	70.8914	56.8876	28.661	16.9385		99.1091	28.614	46.6757	20.1253	88.6598	54.0581	68.9459	44.6989		84.5583	47.541	60.6061	33.4377	106.428	64.6314	72.4786	72.4592
	11.9837	62.0579	125.038	93.6047	57.1564	21.2604	73.5376	68.2817		44.1536	30.8039	100.53	57.1429	67.9621	24.723	97.4466	36.5634		69.459	61.0932	76.0212	49.1694	88.673	50.554	121.356	17.5775
	88.4518	48.2339	110.897	63.5447	59.5302	30.4658	69.363	60.6804		63.198	24.1169	95.8734	18.5159	43.9597	17.6438	61.5099	21.3608		92.9569	42.0828	80.8494	24.2795	62.0805	79.3973	78.5305	19.8576
	62.5837	46.8889		66.5811	89.0805	71.3893				74.0964	16.3704		19.628	88.1609	38.5144				94.0428	61.5556		38.7428	96.1494	13.9615
	80.5052	82.1606		48.2283		34.6741				60.3627	69.5807		20.7677		7.84114				72.5389	26.5103		25.2953		48.6762
Mean	70.8946	66.1717	80.6048	54.493	81.0593	52.3879	81.4805	51.2108		67.4954	34.7585	76.4913	29.3365	93.0489	38.1524	90.2476	42.113		78.1758	42.9102	84.8376	49.9497	87.6027	52.6453	97.6986	63.6855
SEM	6.21921	4.62921	8.80013	6.62473	8.42972	5.48535	10.6322	5.52326		3.92115	4.88731	6.27521	3.85804	7.94015	4.82733	7.6869	5.66455		6.01731	4.09817	5.54276	6.52504	4.78701	5.84953	5.37894	7.9044
Count	15	15	13	15	14	15	13	13		15	15	13	15	14	15	13	13		15	15	13	15	14	15	13	13
Thermal sensitivity (Hargreaves) following treatment with saline or carrageenan at 2, 6, and 24 hr postinjection. Expressed as percent baseline. See Panels A-B tab for baseline.
	2 hr									6 hr									24 hr
	Female				Male					Female				Male					Female				Male
	Air		AIE		Air		AIE			Air		AIE		Air		AIE			Air		AIE		Air		AIE
	Saline	Carrageenan	Saline	Carrageenan	Saline	Carrageenan	Saline	Carrageenan		Saline	Carrageenan	Saline	Carrageenan	Saline	Carrageenan	Saline	Carrageenan		Saline	Carrageenan	Saline	Carrageenan	Saline	Carrageenan	Saline	Carrageenan
	120.359	47.546	82.2404	50	131.712	94.3624	45.3488	22.87		124.85	43.5583	76.2295	18.8596	78.5586	24.0268	80.0388	16.5919		86.5269	40.7975	139.891	75.6579	58.1982	31.6779	62.7907	25.5605
	49.7283	47.3684	64.8822	70.0472	45.3488	42.1739	65.4971	60.8501		87.2283	20.7895	53.7473	30.4245	80.0388	56.9565	64.9123	39.1499		92.3913	33.4211	58.8865	79.4811	62.7907	41.7391	132.749	39.3736
	148.665	44.1176	94.2073	88.2834	85.5908	78.97	75.8197	57.3955		31.8275	54.3344	92.3781	19.0736	135.447	64.3777	128.279	16.0772		117.454	16.8731	98.4756	21.7984	104.899	81.1159	113.115	39.7106
	87.7419	36.5414	97.561	37.7261	105.463	90.9657	85.6305	88.9785		84.5161	20.3008	84.3206	40.0517	113.302	34.2679	90.9091	27.1505		99.0323	20.6015	96.5157	58.6563	104.038	41.7445	71.5543	78.7634
	56.8182	30.4444	93.949	82.8221	118.375	63.2576	85.342	47.1264		73.3471	16.6667	83.121	34.6626	90.9894	10.0379	58.6319	43.3333		61.3636	50.4444	123.567	21.4724	83.5689	33.7121	59.6091	90
	102.579	66.25	54.1209	100	96.5517	62.6016	110.526	31.2655		70.2006	55	57.1429	95.4023	35.1724	48.7805	106.767	31.2655		137.536	62.9167	79.9451	36.0153	54.1379	110.976	71.8045	53.8462
	58.5209	105.344	99.5	54.2725	58.319	25.6532	106.852	37.3077		97.4277	46.8193	100.75	12.2402	67.2384	54.8694	111.991	36.9231		93.5691	21.6285	86.75	37.1824	112.693	27.791	98.9293	36.5385
	90.2866	54.0541	123.706	57.1429	62.9121	65.1515	112.5	82.3529		80.5732	17.3745	94.0054	12.2449	83.7912	30.303	112.083	86.0294		73.2484	31.6602	83.1063	58.309	106.319	59.3074	88.75	108.824
	84.8993	104.505	40.4819	67.8474	107.246	107.258	100.694	60.181		85.5705	59.009	54.9398	45.2316	128.986	69.3548	114.583	25.7919		93.6242	93.2432	69.3976	69.4823	131.884	83.0645	128.472	53.3937
	64.7577	83.4802	55.9701	98.3936	67.9406	61.0656	77.6471	30.5239		144.934	66.9604	74.5025	16.8675	69.8514	26.2295	81.1765	29.385		80.1762	35.6828	93.0348	69.0763	88.7473	39.7541	100	29.385
	85.4599	27.2727	70.7207	44.9339	56.4444	73.3766	96.4567	106.278		97.3294	13.6364	85.8108	39.6476	68	56.4935	70.4724	75.5605		89.0208	52.2727	100.901	117.621	79.5556	69.4805	125.197	44.843
	55.4422	98.5348	116.667	64.6465	38.4615	55.489	79.5053	68.0412		85.7143	31.5018	117.816	22.6263	69.2308	100.998	96.6431	36.0825		129.932	61.5385	118.966	23.6364	65.5385	126.946	113.781	64.433
	107.641	58.1395	64.5892	111.667	95.2756	31.3889	133.488	57.4419		97.01	28.2392	84.8442	47	85.0394	18.6111	109.767	14.8837		123.92	48.505	105.099	113.333	86.6142	59.1667	86.0465	42.7907
	105.263	63.0233		79.1667	89.6947	34.4156				127.632	41.6279		19.7917	128.244	29.2208				122.368	68.1395		40.625	74.4275	62.013
	137.234	69.3654		75		26.9397				159.574	51.86		18		18.5345				79.7872	21.8818		17.25		29.5259
Mean	90.3597	62.3991	81.4304	72.13	82.8097	60.8713	90.4082	57.7394		96.5156	37.8452	81.5083	31.4749	88.135	42.8708	94.3272	36.7865		98.6633	43.9738	96.5027	55.9731	86.6723	59.8676	96.3691	54.4202
SEM	7.83513	6.62723	7.01608	5.56258	7.57672	6.55722	6.38276	6.81589		8.23124	4.56203	5.15786	5.49071	7.66108	6.33009	6.03729	5.98753		5.8179	5.52913	6.16399	8.24849	6.13121	7.77325	7.00324	6.87296
Count	15	15	13	15	14	15	13	13		15	15	13	15	14	15	13	13		15	15	13	15	14	15	13	13
