# Supplementary material for: Adolescent alcohol exposure promotes mechanical allodynia and alters synaptic function at inputs from the basolateral amygdala to the prelimbic cortex
Source: eLife. 2025 May 8;13:RP101667. doi: 10.7554/eLife.101667 (PMC12061479; doi:10.7554/eLife.101667)
Supplement: Figure 4—source data 1. [file elife-101667-fig4-data1.xlsx]

## Sheet: Figure 4
Current evoked firing. Number of action potentials evoked at each injected current.																															Biophysical Properties of PrL-PAG neurons
	Female Air Saline																															Action Potential Threshold (mV)									Rheobase (pA)
	-100	-80	-60	-40	-20	0	20	40	60	80	100	120	140	160	180	200	220	240	260	280	300	320	340	360	380	400		Cumulative				Female				Male					Female				Male
	0	0	0	0	0	0	0	0	0	0	0	1	2	3	5	6	5	7	7	7	8	7	8	7	8	8		89				Air		AIE		Air		AIE			Air		AIE		Air		AIE
	0	0	0	0	0	0	0	0	0	1	1	1	1	1	1	2	2	2	5	9	10	9	10	9	10	10		84				Saline	Carrageenan	Saline	Carrageenan	Saline	Carrageenan	Saline	Carrageenan		Saline	Carrageenan	Saline	Carrageenan	Saline	Carrageenan	Saline	Carrageenan
	0	0	0	0	0	0	0	0	0	1	4	7	9	10	10	11	12	13	13	13	13	14	14	15	15	16		190				-37.6146	-41.3334	-40.3229	-44.8229	-41.3959	-39.0834	-39.9271	-47.3438		120	80	80	40	60	80	80	100
	0	0	0	0	0	0	0	0	0	2	3	5	6	7	8	7	8	8	8	8	10	12	11	10	10	11		134				-35.875	-39.5834	-42.9167	-43.448	-37.8229	-45.4792	-38.9792	-42.4688		80	60	60	80	60	100	60	40
	0	0	0	0	0	0	0	1	3	4	6	8	9	10	10	8	8	10	7	5	6	6	5	8	5	4		123				-36.6354	-42.032	-39.3855	-44.3021	-36.6875	-46.4688	-40.0938	-42.7396		80	60	140	60	60	60	100	60
	0	0	0	0	0	0	0	0	1	4	5	6	6	7	8	10	11	10	9	10	9	7	5	5	6	5		124				-34.0313	-38.3796	-41.0625	-45.4167	-43.6355	-35.8333	-39.4375	-42.739		80	40	60	60	40	60	80	40
	0	0	0	0	0	0	0	0	0	2	5	8	9	10	12	10	11	12	12	13	14	15	13	12	8	10		176				-37.9167	-39.1019	-45.6875	-39.0521	-43.6875	-34.7917	-37.4271	-43.2483		40	60	60	60	60	60	80	60
	0	0	0	0	0	0	0	1	1	2	4	5	6	6	8	7	8	10	9	7	10	9	8	7	7	6		121				-35.0938	-38.367	-46	-39.8619	-42.1563	-36.6146	-39.3646	-41.7656		60	60	60	100	60	60	80	60
	0	0	0	0	0	0	0	1	2	2	5	7	10	12	13	11	11	10	9	10	11	10	11	10	8	7		160				-43.1185	-37.335	-34.0209	-45.1892	-40.7188	-43.25	-35.5625	-45.748		80	80	60	60	60	60	60	60
	0	0	0	0	0	0	0	0	2	5	7	10	12	13	14	13	13	12	10	9	9	7	5	7	6	5		159				-45.1148	-41.2775	-33.073	-37.637	-39.5643	-44.1778	-39.4167	-44.5583		40	60	60	40	80	60	60	60
																																-41.6563	-38.6886	-35.7084	-41.487	-41.5666	-39.8493	-48.5104	-44.8466		40	60	80	40	40	80	60	60
Mean	0	0	0	0	0	0	0	0.3	0.9	2.3	4	5.8	7	7.9	8.9	8.5	8.9	9.4	8.9	9.1	10	9.6	9	9	8.3	8.2		136				-40.6042	-39.2005	-37.2604	-39.3092	-41.9299	-40.278	-35.6459	-46.1582		60	60	60	100	60	60	60	80
SEM	0	0	0	0	0	0	0	0.152753	0.34801	0.495536	0.68313	0.928559	1.10554	1.21518	1.22429	1.00277	1.07961	1.00222	0.752034	0.808977	0.730297	0.991071	1.05409	0.918937	0.907377	1.15277		11.0935
Count	10	10	10	10	10	10	10	10	10	10	10	10	10	10	10	10	10	10	10	10	10	10	10	10	10	10		10			Mean	-38.7661	-39.5299	-39.5438	-42.0526	-40.9165	-40.5826	-39.4365	-44.1616		68	62	72	64	58	68	72	62
																															SEM	1.16348	0.483766	1.43775	0.924862	0.727326	1.30545	1.13841	0.584451		8	3.59011	8	7.18022	3.59011	4.42217	4.42217	5.53775
	Female Air Carrageenan																														Count	10	10	10	10	10	10	10	10		10	10	10	10	10	10	10	10
	-100	-80	-60	-40	-20	0	20	40	60	80	100	120	140	160	180	200	220	240	260	280	300	320	340	360	380	400		Cumulative
	0	0	0	0	0	0	0	0	0	2	4	6	6	8	8	9	9	10	10	8	10	6	7	5	7	6		121
	0	0	0	0	0	0	0	0	2	5	8	13	17	19	21	22	19	13	11	11	14	13	13	11	11	10		233
	0	0	0	0	0	0	0	0	1	3	5	6	8	9	11	10	10	11	11	11	14	12	12	12	13	12		171
	0	0	0	0	0	0	0	1	1	1	2	5	7	8	10	8	9	10	11	12	16	19	19	19	18	19		195
	0	0	0	0	0	0	0	0	3	3	6	9	10	11	13	13	13	10	10	8	8	9	11	11	10	11		169
	0	0	0	0	0	0	0	0	1	5	7	9	11	10	10	11	9	10	11	12	15	17	16	16	17	15		202
	0	0	0	0	0	0	0	0	0	1	2	3	4	5	7	9	12	15	16	14	15	13	11	12	11	9		159
	0	0	0	0	0	0	0	0	2	5	6	6	6	8	7	8	9	12	11	13	13	13	10	11	11	9		160
	0	0	0	0	0	0	0	0	1	1	0	0	2	2	3	6	8	7	7	11	12	12	14	13	13	14		126
	0	0	0	0	0	0	0	0	1	0	2	2	4	4	4	7	8	8	8	10	10	10	12	10	11	11		122
Mean	0	0	0	0	0	0	0	0.1	1.2	2.6	4.2	5.9	7.5	8.4	9.4	10.3	10.6	10.6	10.6	11	12.7	12.4	12.5	12	12.2	11.6		165.8
SEM	0	0	0	0	0	0	0	0.1	0.290593	0.6	0.827312	1.19675	1.36829	1.46969	1.61383	1.44568	1.06667	0.733333	0.748331	0.614636	0.830662	1.17568	1.04616	1.16428	1.03064	1.15662		11.6931
Count	10	10	10	10	10	10	10	10	10	10	10	10	10	10	10	10	10	10	10	10	10	10	10	10	10	10		10
	Female AIE Saline
	-100	-80	-60	-40	-20	0	20	40	60	80	100	120	140	160	180	200	220	240	260	280	300	320	340	360	380	400		Cumulative
	0	0	0	0	0	0	0	0	0	3	7	9	11	13	15	16	18	18	20	21	21	22	22	23	23	24		286
	0	0	0	0	0	0	0	0	4	7	8	9	10	11	12	13	14	15	20	16	17	18	16	13	10	8		221
	0	0	0	0	0	0	0	0	0	0	0	0	1	3	4	6	7	8	8	9	9	10	10	10	10	9		104
	0	0	0	0	0	0	0	0	2	2	4	5	5	7	7	8	11	11	12	13	13	13	13	13	13	13		165
	0	0	0	0	0	0	0	0	1	3	6	7	8	9	10	9	13	11	15	18	17	18	18	16	15	17		211
	0	0	0	0	0	0	0	0	2	0	2	3	3	2	6	7	9	8	10	12	13	11	8	9	6	6		117
	0	0	0	0	0	0	0	0	2	2	3	5	6	7	8	8	7	9	8	7	4	6	8	8	8	9		115
	0	0	0	0	0	0	0	0	2	3	4	6	7	10	10	13	14	15	16	16	16	18	19	20	20	20		229
	0	0	0	0	0	0	0	0	0	1	3	2	4	3	3	7	8	10	8	9	8	8	6	6	5	4		95
	0	0	0	0	0	0	0	0	2	1	1	2	4	4	8	10	12	11	13	10	8	7	11	12	11	12		139
Mean	0	0	0	0	0	0	0	0	1.5	2.2	3.8	4.8	5.9	6.9	8.3	9.7	11.3	11.6	13	13.1	12.6	13.1	13.1	13	12.1	12.2		168.2
SEM	0	0	0	0	0	0	0	0	0.401386	0.646357	0.81377	0.963789	0.99387	1.206	1.14552	1.03333	1.13578	1.0562	1.47573	1.43333	1.668	1.76037	1.70913	1.69312	1.84059	2.021		20.5447
Count	10	10	10	10	10	10	10	10	10	10	10	10	10	10	10	10	10	10	10	10	10	10	10	10	10	10		10
	Female AIE Carrageenan
	-100	-80	-60	-40	-20	0	20	40	60	80	100	120	140	160	180	200	220	240	260	280	300	320	340	360	380	400		Cumulative
	0	0	0	0	0	0	0	1	7	10	13	15	16	18	18	18	19	20	21	21	22	22	22	22	22	22		329
	0	0	0	0	0	0	0	0	0	3	4	7	9	8	11	9	10	11	12	13	13	11	10	9	8	9		157
	0	0	0	0	0	0	0	0	3	7	9	12	13	15	14	14	15	17	14	13	12	12	9	10	8	7		204
	0	0	0	0	0	0	0	0	2	2	5	7	9	10	10	8	9	8	8	8	7	4	7	6	4	4		118
	0	0	0	0	0	0	0	0	1	1	3	4	4	6	6	8	8	11	11	13	13	14	14	12	11	12		152
	0	0	0	0	0	0	0	0	0	0	1	2	4	5	6	10	12	13	14	14	17	16	17	17	17	17		182
	0	0	0	0	0	0	0	0	2	3	4	5	6	8	8	8	9	10	10	6	6	5	5	6	8	6		115
	0	0	0	0	0	0	0	1	4	7	9	12	13	14	14	9	10	7	10	8	7	7	7	8	7	8		162
	0	0	0	0	0	0	0	1	3	5	10	10	10	14	13	12	14	14	14	9	12	11	9	7	6	4		178
	0	0	0	0	0	0	0	0	0	0	3	6	7	9	10	14	16	16	18	19	20	20	20	18	16	18		230
Mean	0	0	0	0	0	0	0	0.3	2.2	3.8	6.1	8	9.1	10.7	11	11	12.2	12.7	13.2	12.4	12.9	12.2	12	11.5	10.7	10.7		182.7
SEM	0	0	0	0	0	0	0	0.152753	0.69602	1.06249	1.22429	1.29957	1.26886	1.35851	1.21106	1.07497	1.15277	1.3	1.24544	1.53623	1.72852	1.8962	1.86786	1.77795	1.81995	1.99472		19.6972
Count	10	10	10	10	10	10	10	10	10	10	10	10	10	10	10	10	10	10	10	10	10	10	10	10	10	10		10
	Male Air Saline
	-100	-80	-60	-40	-20	0	20	40	60	80	100	120	140	160	180	200	220	240	260	280	300	320	340	360	380	400		Cumulative
	0	0	0	0	0	0	0	0	3	5	7	8	9	9	10	11	11	11	12	12	12	10	10	7	7	7		161
	0	0	0	0	0	0	0	0	2	4	6	7	9	9	7	7	7	9	5	6	4	5	5	5	5	4		106
	0	0	0	0	0	0	0	0	2	7	10	13	15	16	18	19	20	21	22	22	23	20	13	11	9	6		267
	0	0	0	0	0	0	0	1	3	5	8	7	8	7	8	8	8	9	10	8	9	10	12	10	12	10		153
	0	0	0	0	0	0	0	0	1	2	2	3	4	6	4	6	5	8	8	7	7	6	7	8	9	9		102
	0	0	0	0	0	0	0	0	1	3	4	6	7	9	9	9	8	10	8	7	8	6	7	7	8	8		125
	0	0	0	0	0	0	0	0	1	4	6	8	9	10	11	12	14	15	15	16	15	11	8	8	6	7		176
	0	0	0	0	0	0	0	0	0	4	4	5	5	8	8	9	10	11	12	15	16	13	11	12	13	12		168
	0	0	0	0	0	0	0	1	3	4	6	9	10	11	10	9	8	10	9	7	7	8	9	8	7	9		145
	0	0	0	0	0	0	0	0	3	4	5	6	7	9	8	9	9	11	9	8	6	5	7	9	10	9		134
Mean	0	0	0	0	0	0	0	0.2	1.9	4.2	5.8	7.2	8.3	9.4	9.3	9.9	10	11.5	11	10.8	10.7	9.4	8.9	8.5	8.6	8.1		153.7
SEM	0	0	0	0	0	0	0	0.133333	0.34801	0.416333	0.711805	0.840635	0.955103	0.85894	1.14552	1.1494	1.3499	1.21335	1.49815	1.67862	1.83818	1.46211	0.808977	0.654047	0.805536	0.706321		14.8429
Count	10	10	10	10	10	10	10	10	10	10	10	10	10	10	10	10	10	10	10	10	10	10	10	10	10	10		10
	Male Air Carrageenan
	-100	-80	-60	-40	-20	0	20	40	60	80	100	120	140	160	180	200	220	240	260	280	300	320	340	360	380	400		Cumulative
	0	0	0	0	0	0	0	0	0	1	1	4	9	11	11	5	8	7	5	11	13	12	12	12	9	9		140
	0	0	0	0	0	0	0	0	0	0	1	1	3	5	5	4	4	9	9	7	7	6	6	7	7	5		86
	0	0	0	0	0	0	0	0	1	4	6	8	9	11	8	7	9	7	6	5	13	12	11	12	10	10		149
	0	0	0	0	0	0	0	0	3	6	7	11	13	13	15	14	13	10	10	10	12	10	13	12	15	16		203
	0	0	0	0	0	0	0	0	1	3	3	3	3	4	4	5	6	9	10	13	13	14	14	16	17	16		154
	0	0	0	0	0	0	0	0	5	9	10	10	12	13	12	15	14	16	15	14	10	8	8	11	14	13		209
	0	0	0	0	0	0	0	0	2	7	9	12	14	16	15	12	11	11	10	10	9	10	10	10	10	10		188
	0	0	0	0	0	0	0	0	2	4	5	8	11	11	13	12	11	12	9	9	8	9	9	10	10	8		161
	0	0	0	0	0	0	0	0	0	4	5	7	9	10	14	15	16	15	17	15	18	16	11	14	12	11		209
	0	0	0	0	0	0	0	0	2	5	9	11	14	16	16	12	13	13	12	10	10	9	9	7	7	6		181
Mean	0	0	0	0	0	0	0	0	1.6	4.3	5.6	7.5	9.7	11	11.3	10.1	10.5	10.9	10.3	10.4	11.3	10.6	10.3	11.1	11.1	10.4		168
SEM	0	0	0	0	0	0	0	0	0.498888	0.843933	1.02415	1.18556	1.2741	1.26491	1.35031	1.38604	1.18556	0.982627	1.15518	0.968389	1.0116	0.933333	0.760847	0.887568	1.05883	1.18509		12.1427
Count	10	10	10	10	10	10	10	10	10	10	10	10	10	10	10	10	10	10	10	10	10	10	10	10	10	10		10
	Male AIE Saline
	-100	-80	-60	-40	-20	0	20	40	60	80	100	120	140	160	180	200	220	240	260	280	300	320	340	360	380	400		Cumulative
	0	0	0	0	0	0	0	0	0	2	3	4	4	6	7	9	11	11	11	11	11	13	13	11	11	13		151
	0	0	0	0	0	0	0	0	4	5	8	10	11	12	13	14	14	15	16	16	15	16	14	16	11	12		222
	0	0	0	0	0	0	0	0	0	0	2	2	3	3	4	6	6	6	7	7	7	8	12	16	14	14		117
	0	0	0	0	0	0	0	0	0	7	9	11	12	13	14	14	15	15	16	16	17	16	17	17	17	18		244
	0	0	0	0	0	0	0	0	0	3	3	3	4	4	4	5	6	5	6	8	5	8	6	7	7	9		93
	0	0	0	0	0	0	0	0	0	7	9	11	12	13	14	14	15	15	16	16	17	16	17	17	17	18		244
	0	0	0	0	0	0	0	0	1	2	6	9	12	13	16	16	15	15	14	12	11	10	9	7	6	7		181
	0	0	0	0	0	0	0	0	2	5	7	7	9	10	10	9	8	10	11	11	12	10	10	10	12	9		162
	0	0	0	0	0	0	0	0	1	1	2	2	4	5	6	11	14	16	19	15	17	15	16	17	16	15		192
	0	0	0	0	0	0	0	0	3	5	6	9	11	11	13	13	15	13	13	11	9	10	12	13	13	15		195
Mean	0	0	0	0	0	0	0	0	1.1	3.7	5.5	6.8	8.2	9	10.1	11.1	11.9	12.1	12.9	12.3	12.1	12.2	12.6	13.1	12.4	13		180.1
SEM	0	0	0	0	0	0	0	0	0.458258	0.775314	0.885061	1.17189	1.24544	1.28236	1.42556	1.17804	1.21518	1.26007	1.32035	1.05462	1.36991	1.06249	1.13725	1.29486	1.21289	1.19257		15.9961
Count	10	10	10	10	10	10	10	10	10	10	10	10	10	10	10	10	10	10	10	10	10	10	10	10	10	10		10
	Male AIE Carrageenan
	-100	-80	-60	-40	-20	0	20	40	60	80	100	120	140	160	180	200	220	240	260	280	300	320	340	360	380	400		Cumulative
	0	0	0	0	0	0	0	0	0	0	1	5	7	8	9	11	13	14	16	18	19	20	21	22	23	24		231
	0	0	0	0	0	0	0	1	3	7	11	13	15	16	16	15	18	16	20	20	21	18	17	17	15	15		274
	0	0	0	0	0	0	0	0	2	3	5	8	11	13	14	14	15	16	15	14	15	14	14	14	13	13		213
	0	0	0	0	0	0	0	1	3	7	8	10	13	12	13	13	15	12	14	14	19	15	13	15	15	13		225
	0	0	0	0	0	0	0	0	1	0	1	3	4	6	7	8	10	11	11	16	19	19	17	18	15	15		181
	0	0	0	0	0	0	0	0	3	6	9	11	11	14	15	17	17	20	20	19	17	16	14	14	13	13		249
	0	0	0	0	0	0	0	0	1	3	6	8	11	11	13	10	11	11	11	12	10	11	10	10	9	8		166
	0	0	0	0	0	0	0	0	1	4	7	10	12	13	13	11	11	14	13	12	12	9	6	5	3	3		159
	0	0	0	0	0	0	0	0	4	8	10	13	15	15	17	17	16	17	17	14	11	11	10	11	10	11		227
	0	0	0	0	0	0	0	0	0	1	3	5	8	9	11	10	12	9	11	11	12	11	12	11	11	12		159
Mean	0	0	0	0	0	0	0	0.2	1.8	3.9	6.1	8.6	10.7	11.7	12.8	12.6	13.8	14	14.8	15	15.5	14.4	13.4	13.7	12.7	12.7		208.4
SEM	0	0	0	0	0	0	0	0.133333	0.442217	0.948098	1.1299	1.0873	1.10604	1.0116	0.975249	0.979796	0.879394	1.05409	1.09341	0.988826	1.26711	1.21289	1.35154	1.50591	1.63333	1.69345		12.708
Count	10	10	10	10	10	10	10	10	10	10	10	10	10	10	10	10	10	10	10	10	10	10	10	10	10	10		10
[truncated: 16 more columns]
