# Supplementary material for: Adolescent alcohol exposure promotes mechanical allodynia and alters synaptic function at inputs from the basolateral amygdala to the prelimbic cortex
Source: eLife. 2025 May 8;13:RP101667. doi: 10.7554/eLife.101667 (PMC12061479; doi:10.7554/eLife.101667)
Supplement: Figure 5—source data 1. [file elife-101667-fig5-data1.xlsx]

## Sheet: Figure 5
BLA-driven oEPSCs and oIPSCs onto PrLPAG neurons.
	oEPSC Amplitude (pA) - These are absolute values									oIPSC Amplitude (pA)									E/I Ratio
	Female				Male					Female				Male					Female				Male
	Air		AIE		Air		AIE			Air		AIE		Air		AIE			Air		AIE		Air		AIE
	Saline	Carr	Saline	Carr	Saline	Carr	Saline	Carr		Saline	Carr	Saline	Carr	Saline	Carr	Saline	Carr		Saline	Carr	Saline	Carr	Saline	Carr	Saline	Carr
	108.866	310.576	381.416	210.264	445.857	320.815	337.092	171.629		217.448	209.443	275.053	76.2135	430.569	401.285	118.015	138.6		0.500653	1.48287	1.3867	2.75888	1.03551	0.799469	2.85635	1.2383
	295.806	230.2	319.127	519.885	286.571	261.486	106.063	196.812		244.026	191.848	210.72	298.75	404.718	582.239	52.2131	171.876		1.21219	1.19991	1.51446	1.7402	0.708076	0.449104	2.03135	1.14508
	58.1183	296.389	278.89	104.877	103.776	267.819	236.3	236.146		66.8032	269.183	116.536	65.5773	149.282	615.965	246.339	224.445		0.869993	1.10107	2.39317	1.59929	0.695168	0.434796	0.959247	1.05213
	384.161	196.19	199.638	388.977	112.306	204.519	136.805	179.314		624.303	190.694	139.332	255.988	200.49	491.807	151.32	187.8		0.615344	1.02882	1.43282	1.51951	0.560158	0.415852	0.904077	0.954814
	252.275	279.943	258.364	178.69	177.713	264.471	114.114	147.008		355.578	283.481	186.683	129.69	361.469	1003.36	138.044	140.34		0.709479	0.987519	1.38397	1.37782	0.491641	0.263585	0.826649	1.04751
	261.12	141.019	308.117	143.409	64.5346	161.445	501.616	195.8		593.265	540.694	269.097	132.704	154.8	846.622	547.727	192.936		0.440141	0.260811	1.145	1.08067	0.41689	0.190693	0.915814	1.01484
	258.01	101.545	273.392	235.461	137.553	123.064	280.158	216.729		436.53	511.678	312.959	227.43	365.564	623.27	299.828	221.345		0.591048	0.198455	0.873571	1.03531	0.376276	0.197449	0.934396	0.979146
	192.409	152.623	292.584	239.336	302.579	91.814	108.473	201.397		382.788	757.751	333.553	231.426	810.774	464.341	126.144	199.452		0.502652	0.201416	0.877174	1.03418	0.373198	0.19773	0.859914	1.00975
	273.431	215.036	185.241	524.351	124.715	236.303		186.079		349.623	923.001	193.423	561.923	290.764	916.267		186.668		0.782074	0.232975	0.957699	0.933137	0.428922	0.257898		0.996845
	272.739	104.017		311.654	252.294	122.973		207.443		379.963	550.083		341.248	590.403	436.963		198.187		0.717804	0.189093		0.913277	0.427325	0.281427		1.0467
Mean	235.694	202.754	277.419	285.69	200.79	205.471	227.578	193.836		365.033	442.786	226.373	232.095	375.883	638.212	209.954	186.165		0.694138	0.688293	1.3294	1.39923	0.551316	0.3488	1.28597	1.04851
SEM	29.6955	24.4074	19.9497	46.8918	37.499	24.3161	49.9994	7.83605		52.7734	81.1131	25.2009	46.9195	64.7662	67.1842	55.4945	9.21314		0.0717469	0.162796	0.156669	0.177652	0.0661762	0.0592402	0.264824	0.0267209
Count	10	10	9	10	10	10	8	10		10	10	9	10	10	10	8	10		10	10	9	10	10	10	8	10
