# Supplementary material for: Adolescent alcohol exposure promotes mechanical allodynia and alters synaptic function at inputs from the basolateral amygdala to the prelimbic cortex
Source: eLife. 2025 May 8;13:RP101667. doi: 10.7554/eLife.101667 (PMC12061479; doi:10.7554/eLife.101667)
Supplement: Figure 6—source data 1. [file elife-101667-fig6-data1.xlsx]

## Sheet: Figure 6
Monosynaptic AMPA and NMDA currents at BLA inputs onto PrLPAG neurons.
	AMPA Amplitude (pA)									NMDA Amplitude (pA)									AMPA/NMDA Ratio
	Female				Male					Female				Male					Female				Male
	Air		AIE		Air		AIE			Air		AIE		Air		AIE			Air		AIE		Air		AIE
	Saline	Carr	Saline	Carr	Saline	Carr	Saline	Carr		Saline	Carr	Saline	Carr	Saline	Carr	Saline	Carr		Saline	Carr	Saline	Carr	Saline	Carr	Saline	Carr
	66.593	87.4256	62.2092	97.5667	79.1686	83.5737	59.7771	66.0008		56.6249	76.9429	88.3868	81.1852	58.4826	45.7782	57.8989	41.0081		1.17604	1.13624	0.703829	1.20178	1.35371	1.82562	1.03244	1.60946
	78.8919	90.5311	106.071	86.1877	65.3569	63.8921	46.1604	95.5439		71.1835	86.2306	199.506	74.14	48.8485	39.0241	48.2189	73.1156		1.10829	1.04987	0.531668	1.1625	1.33795	1.63725	0.957309	1.30675
	94.5598	76.1286	84.5671	84.526	74.9982	76.4992	84.2648	78.207		86.9128	73.7216	137.698	76.7568	60.7625	48.2401	94.2241	61.4764		1.08798	1.03265	0.614149	1.10122	1.23428	1.5858	0.894302	1.27215
	78.6645	93.5556	69.3291	100.044	78.904	106.344	97.1333	65.1485		79.6032	92.911	114.626	94.327	72.8176	81.2996	85.2578	55.3925		0.988208	1.00694	0.604829	1.06061	1.08358	1.30805	1.13929	1.17612
	95.5116	84.8631	78.972	88.6425	81.1726	82.3187	92.2203	82.4064		120.497	88.3689	135.67	103.478	76.3589	69.3269	85.9682	86.3578		0.792647	0.960328	0.582089	0.856631	1.06304	1.1874	1.07273	0.954244
	88.3729	90.7413	70.5954	79.2181	72.7056	95.6507	93.1071	107.582		115.46	100.994	48.2573	112.76	73.66	129.889	163.017	130.496		0.765398	0.898482	1.4629	0.702537	0.987043	0.736403	0.57115	0.824408
	80.26	78.6153	102.217	88.7522	77.305	76.7348	75.4391	71.5462		118.403	77.3147	87.1252	133.872	81.1103	108.568	151.545	109.1		0.677854	1.01682	1.17322	0.662963	0.953085	0.70679	0.4978	0.655786
	102.567	88.2071	103.51	82.333	79.9284	71.4202	95.171	128.879		176.842	90.2012	97.1342	126.08	89.158	104.568	130.956	206.378		0.579992	0.977893	1.06564	0.653022	0.89648	0.683002	0.72674	0.62448
	76.1907	83.2354	85.751	92.5294	63.7665	63.1913	86.0455	80.0371		139.855	92.9611	72.4877	151.091	75.8002	101.727	86.4258	146.102		0.544784	0.895379	1.18297	0.612408	0.841244	0.621185	0.9956	0.547817
	110.44	78.1859	95.9698	80.7012	97.6233	95.5574	87.5398	64.8884		244.879	89.462	84.6007	142.271	125.712	180.538	97.4867	68.7508		0.450998	0.873957	1.13439	0.567236	0.776563	0.529292	0.897967	0.94382
Mean	87.2051	85.1489	85.9192	88.0501	77.0929	81.5182	81.6858	84.0239		121.026	86.9108	106.549	109.596	76.2711	90.8959	100.1	97.8177		0.817219	0.984856	0.905568	0.85809	1.0527	1.08208	0.878532	0.991504
SEM	4.26453	1.89071	4.94918	2.20079	2.96794	4.49025	5.27351	6.62906		17.7511	2.70035	13.4826	8.86556	6.63477	13.8547	11.8688	16.0714		0.0818773	0.0256804	0.105288	0.0788948	0.0637367	0.153281	0.0676931	0.109034
Count	10	10	10	10	10	10	10	10		10	10	10	10	10	10	10	10		10	10	10	10	10	10	10	10
