# Supplementary material for: Adolescent alcohol exposure promotes mechanical allodynia and alters synaptic function at inputs from the basolateral amygdala to the prelimbic cortex
Source: eLife. 2025 May 8;13:RP101667. doi: 10.7554/eLife.101667 (PMC12061479; doi:10.7554/eLife.101667)
Supplement: Figure 7—source data 1. [file elife-101667-fig7-data1.xlsx]

## Sheet: Figure 7
aEPSCs at BLA inputs onto PrLPAG neurons.
	aEPSC Amplitude (pA) - These are absolute values.									aEPSC Interevent Interval (ms)
	Female				Male					Female				Male
	Air		AIE		Air		AIE			Air		AIE		Air		AIE
	Saline	Carr	Saline	Carr	Saline	Carr	Saline	Carr		Saline	Carr	Saline	Carr	Saline	Carr	Saline	Carr
	15.6565	12.8932	14.0465	10.7091	15.6985	12.9357	10.9452	15.6272		22.9583	19.5	15.3833	25.195	19.2884	20.6871	20.515	20.1625
	16.1161	13.6828	12.4325	17.3562	12.4996	11.4691	11.4264	12.6732		22.9344	21.62	18.3643	19.7389	19.8563	18.0829	19.4208	15.1
	11.1998	14.3652	12.8909	13.658	14.5471	16.1116	11.5106	11.5148		20.1667	15.775	20.86	17.83	19.5243	23.9375	19.8583	22.14
	16.1336	15.2673	14.1803	14.0031	9.73084	15.2576	16.729	12.8731		21.9333	20.46	15.5727	20.2375	21.4229	19.1	19.7778	18.0667
	13.6673	11.1783	11.2745	14.7071	14.3612	14.066	13.8202	10.65		20.3722	21.275	22.5	16.3375	21.1114	21.6042	20.6129	20.52
	15.2904	17.248	17.3831	14.1735	14.5092	10.1856	13.8853	12.8883		17.9989	19.38	22.6564	18.7	20.525	23	19.8667	22.32
	17.6466	17.3393	17.4434	12.5395	11.5628	13.6703	12.2525	15.2329		19.9505	23.2333	22.0088	18.6174	19.445	21.25	18.46	18.35
	12.2064	15.297	18.3193	14.3861	11.9459	16.8517	9.18639	11.6924		21.3028	20.6	22.1736	19.2747	22.1563	20.3857	21.35	24.5
	15.2912	15.6642	16.8561	12.9049	9.39157	11.0354		15.6477		21.4556	22.3167	22.3825	19.5254	15.5921	19.2333		19.6
	17.2396	12.6043	17.4783	11.6199	12.3586	11.8927		14.5951		20.8976	20.2429	23.1498	18.7483	19.3214	19.2143		25
Mean	15.0447	14.554	15.2305	13.6057	12.6605	13.3476	12.4694	13.3395		20.997	20.4403	20.5051	19.4205	19.8243	20.6495	19.9827	20.5759
SEM	0.65957	0.632969	0.80432	0.580546	0.668333	0.709823	0.814261	0.576038		0.470864	0.643328	0.939516	0.728747	0.565959	0.584358	0.30634	0.959294
Count	10	10	10	10	10	10	8	10		10	10	10	10	10	10	8	10
