# Supplementary material for: Adolescent alcohol exposure promotes mechanical allodynia and alters synaptic function at inputs from the basolateral amygdala to the prelimbic cortex
Source: eLife. 2025 May 8;13:RP101667. doi: 10.7554/eLife.101667 (PMC12061479; doi:10.7554/eLife.101667)
Supplement: Figure 8—source data 1. [file elife-101667-fig8-data1.xlsx]

## Sheet: Figure 8
Current evoked firing. Number of action potentials evoked at each injected current.
	Female Air Saline
	-100	-80	-60	-40	-20	0	20	40	60	80	100	120	140	160	180	200	220	240	260	280	300	320	340	360	380	400		Cumulative
	0	0	0	0	0	0	0	0	0	31	46	52	62	69	74	74	67	57	52	70	36	32	29	26	25	19		821
	0	0	0	0	0	0	0	4	7	13	19	16	27	18	17	18	21	23	25	23	26	28	34	31	38	39		427
	0	0	0	0	0	0	0	2	3	3	2	5	5	23	35	37	40	35	37	41	46	43	47	59	56	56		575
	0	0	0	0	0	0	0	3	5	9	12	3	12	10	5	6	12	12	14	11	15	13	15	19	20	20		216
	0	0	0	0	0	0	0	4	7	13	18	18	24	19	19	22	22	21	22	29	27	30	33	37	38	39		442
	0	0	0	0	0	0	0	2	4	8	12	13	12	14	20	25	31	31	33	34	39	39	44	50	51	53		515
	0	0	0	0	0	0	0	5	10	15	23	20	30	36	28	25	30	27	29	32	36	34	38	50	48	48		564
	0	0	0	0	0	0	0	5	7	10	15	12	5	7	6	8	11	12	14	14	15	17	21	23	23	24		249
	0	0	0	0	0	0	0	3	5	10	15	16	21	23	23	26	34	33	37	41	48	46	51	68	63	64		627
	0	0	0	0	0	0	0	2	5	6	9	9	9	10	22	24	27	29	32	30	33	36	41	39	46	46		455
Mean	0	0	0	0	0	0	0	3	5.3	11.8	17.1	16.4	20.7	22.9	24.9	26.5	29.5	28	29.5	32.5	32.1	31.8	35.3	40.2	40.8	40.8		489.1
SEM	0	0	0	0	0	0	0	0.494413	0.856997	2.4074	3.69519	4.31844	5.39969	5.77437	6.1544	5.99305	5.07992	4.09878	3.64311	5.23503	3.61002	3.3193	3.59336	5.1225	4.62073	4.93694		56.0062
Count	10	10	10	10	10	10	10	10	10	10	10	10	10	10	10	10	10	10	10	10	10	10	10	10	10	10		10
	Female Air Carrageenan
	-100	-80	-60	-40	-20	0	20	40	60	80	100	120	140	160	180	200	220	240	260	280	300	320	340	360	380	400		Cumulative
	0	0	0	0	0	0	0	0	0	0	0	1	8	21	34	41	49	54	59	63	67	69	72	74	77	79		768
	0	0	0	0	0	0	0	0	0	0	1	4	4	7	8	8	8	8	8	10	8	10	10	10	10	10		124
	0	0	0	0	0	0	0	6	12	22	34	38	29	14	23	36	44	48	53	59	63	68	79	85	90	93		896
	0	0	0	0	0	0	0	3	5	5	6	13	6	8	33	41	41	41	44	45	44	50	58	46	59	60		608
	0	0	0	0	0	0	0	4	8	16	23	23	22	21	25	33	36	37	40	43	44	48	56	56	62	64		661
	0	0	0	0	0	0	0	5	10	16	28	32	30	25	37	41	44	46	50	54	56	61	71	71	80	82		839
	0	0	0	0	0	0	0	1	3	6	8	12	10	7	25	22	22	19	21	21	23	20	23	24	27	27		321
	0	0	0	0	0	0	0	1	1	3	5	14	12	8	28	31	30	32	34	33	32	38	45	33	46	48		474
	0	0	0	0	0	0	0	3	5	9	10	9	4	10	14	15	19	17	19	20	24	22	24	34	32	32		322
	0	0	0	0	0	0	0	1	2	4	6	5	5	17	23	23	27	26	29	28	32	31	36	37	41	41		414
Mean	0	0	0	0	0	0	0	2.4	4.6	8.1	12.1	15.1	13	13.8	25	29.1	32	32.8	35.7	37.6	39.3	41.7	47.4	47	52.4	53.6		542.7
SEM	0	0	0	0	0	0	0	0.669992	1.335	2.37323	3.75189	3.87141	3.2249	2.14372	2.82056	3.68616	4.14729	4.76282	5.21121	5.69249	5.99824	6.59132	7.47172	7.59678	8.12841	8.44485		80.006
Count	10	10	10	10	10	10	10	10	10	10	10	10	10	10	10	10	10	10	10	10	10	10	10	10	10	10		10
	Female AIE Saline
	-100	-80	-60	-40	-20	0	20	40	60	80	100	120	140	160	180	200	220	240	260	280	300	320	340	360	380	400		Cumulative
	0	0	0	0	0	0	0	0	0	1	1	4	4	4	7	7	10	7	4	7	7	4	7	7	7	4		92
	0	0	0	0	0	0	0	0	0	1	1	5	5	5	6	4	6	6	6	6	6	6	6	6	6	6		87
	0	0	0	0	0	0	0	3	5	9	10	9	14	10	7	5	4	5	5	6	5	7	9	7	9	10		139
	0	0	0	0	0	0	0	5	10	17	27	23	20	7	1	14	24	30	34	33	41	42	50	59	60	62		559
	0	0	0	0	0	0	0	3	5	7	11	1	7	22	33	32	35	32	34	36	41	39	41	53	50	50		532
	0	0	0	0	0	0	0	1	3	5	7	7	14	6	18	17	11	13	15	12	12	14	18	8	18	19		218
	0	0	0	0	0	0	0	2	4	5	12	5	12	7	15	20	22	23	26	23	33	30	34	44	42	43		402
	0	0	0	0	0	0	0	3	5	7	11	8	14	37	42	37	41	37	40	43	47	45	50	59	59	59		644
	0	0	0	0	0	0	0	4	6	11	18	20	11	23	36	39	41	41	44	48	49	51	60	58	66	68		694
	0	0	0	0	0	0	0	3	5	5	7	14	6	3	9	12	13	15	18	14	14	18	22	15	22	23		238
Mean	0	0	0	0	0	0	0	2.4	4.3	6.8	10.5	9.6	10.7	12.4	17.4	18.7	20.7	20.9	22.6	22.8	25.5	25.6	29.7	31.6	33.9	34.4		360.5
SEM	0	0	0	0	0	0	0	0.520683	0.919541	1.50407	2.44154	2.27156	1.6128	3.54087	4.57821	4.13132	4.47723	4.26732	4.76375	5.08768	5.78168	5.65528	6.31585	7.82333	7.58866	7.82191		74.0421
Count	10	10	10	10	10	10	10	10	10	10	10	10	10	10	10	10	10	10	10	10	10	10	10	10	10	10		10
	Female AIE Carrageenan
	-100	-80	-60	-40	-20	0	20	40	60	80	100	120	140	160	180	200	220	240	260	280	300	320	340	360	380	400		Cumulative
	0	0	0	0	0	0	0	1	3	4	7	7	9	14	20	22	24	25	26	24	26	27	26	22	24	24		335
	0	0	0	0	0	0	0	11	17	21	23	26	28	30	31	31	33	34	35	34	35	24	10	3	4	3		433
	0	0	0	0	0	0	0	0	0	0	0	0	0	17	36	41	47	52	56	60	64	68	70	73	76	77		737
	0	0	0	0	0	0	0	0	0	0	0	2	2	4	6	5	5	7	8	6	12	7	12	5	7	7		95
	0	0	0	0	0	0	0	2	3	5	6	4	9	3	14	19	21	22	24	21	23	23	28	20	29	30		306
	0	0	0	0	0	0	0	3	5	8	16	20	7	14	29	32	31	32	32	40	34	41	48	37	48	50		527
	0	0	0	0	0	0	0	4	6	9	12	11	9	28	36	41	38	37	39	41	37	41	49	34	49	50		571
	0	0	0	0	0	0	0	1	2	5	5	6	11	9	26	27	30	25	26	30	32	30	32	43	41	41		422
	0	0	0	0	0	0	0	3	5	9	12	5	9	32	33	26	25	21	22	23	23	21	23	24	27	27		370
	0	0	0	0	0	0	0	2	4	7	13	22	18	15	32	34	35	38	41	42	42	48	57	47	60	62		619
Mean	0	0	0	0	0	0	0	2.7	4.5	6.8	9.4	10.3	10.2	16.6	26.3	27.8	28.9	29.3	30.9	32.1	32.8	33	35.5	30.8	36.5	37.1		441.5
SEM	0	0	0	0	0	0	0	1.0116	1.52934	1.88444	2.28133	2.88694	2.50688	3.27346	3.15894	3.415	3.56355	3.85299	4.10271	4.68911	4.41412	5.39959	6.24366	6.59933	7.18834	7.41837		57.5651
Count	10	10	10	10	10	10	10	10	10	10	10	10	10	10	10	10	10	10	10	10	10	10	10	10	10	10		10
	Male Air Saline
	-100	-80	-60	-40	-20	0	20	40	60	80	100	120	140	160	180	200	220	240	260	280	300	320	340	360	380	400		Cumulative
	0	0	0	0	0	0	0	3	8	13	17	20	23	24	26	27	26	21	26	19	14	14	10	9	10	7		317
	0	0	0	0	0	0	0	1	2	1	2	6	6	5	16	18	18	18	19	23	22	23	27	24	28	29		288
	0	0	0	0	0	0	0	3	5	10	14	11	4	10	17	21	22	22	23	23	24	24	30	27	33	34		357
	0	0	0	0	0	0	0	1	2	4	6	16	15	14	21	24	25	31	33	31	30	37	46	27	45	47		455
	0	0	0	0	0	0	0	3	6	10	16	17	14	21	15	11	11	10	11	14	17	18	20	32	27	27		300
	0	0	0	0	0	0	0	2	4	4	6	17	17	14	28	32	37	40	43	44	48	51	60	58	66	68		639
	0	0	0	0	0	0	0	2	4	6	11	16	7	8	11	24	32	35	40	39	44	47	55	56	61	63		561
	0	0	0	0	0	0	0	5	9	15	23	29	32	15	22	27	33	39	43	43	47	52	63	57	68	71		693
	0	0	0	0	0	0	0	1	2	5	7	14	17	9	14	27	36	39	43	43	51	51	59	68	68	69		623
	0	0	0	0	0	0	0	3	5	10	15	16	15	14	15	23	28	29	32	32	37	38	44	48	50	52		506
Mean	0	0	0	0	0	0	0	2.4	4.7	7.8	11.7	16.2	15	13.4	18.5	23.4	26.8	28.4	31.3	31.1	33.4	35.5	41.4	40.6	45.6	46.7		473.9
SEM	0	0	0	0	0	0	0	0.4	0.775314	1.41264	2.03333	1.87261	2.64155	1.83908	1.74642	1.83303	2.60256	3.25303	3.57476	3.46875	4.35686	4.65534	5.88444	6.08495	6.4622	6.8913		48.2529
Count	10	10	10	10	10	10	10	10	10	10	10	10	10	10	10	10	10	10	10	10	10	10	10	10	10	10		10
	Male Air Carrageenan
	-100	-80	-60	-40	-20	0	20	40	60	80	100	120	140	160	180	200	220	240	260	280	300	320	340	360	380	400		Cumulative
	0	0	0	0	0	0	0	0	0	0	0	0	0	0	0	0	0	1	5	10	10	15	20	20	25	25		131
	0	0	0	0	0	0	0	0	0	0	0	0	0	0	3	20	33	46	53	50	62	66	71	74	77	79		634
	0	0	0	0	0	0	0	3	5	8	14	11	14	19	31	28	27	26	28	28	29	31	35	32	39	40		448
	0	0	0	0	0	0	0	2	4	6	13	22	23	20	36	37	36	40	42	42	40	48	58	39	59	60		627
	0	0	0	0	0	0	0	3	5	9	9	14	5	20	38	41	44	43	46	50	53	54	61	66	68	70		699
	0	0	0	0	0	0	0	3	5	9	13	19	14	14	26	33	36	39	42	43	45	50	59	54	63	65		632
	0	0	0	0	0	0	0	3	5	10	14	18	12	13	16	17	23	23	25	24	31	31	35	41	41	41		423
	0	0	0	0	0	0	0	1	2	3	5	14	13	23	24	31	38	41	44	45	52	53	60	68	69	70		656
	0	0	0	0	0	0	0	2	4	9	11	16	19	5	4	14	22	26	31	28	35	36	43	46	50	51		452
	0	0	0	0	0	0	0	3	5	10	16	21	23	9	16	24	26	32	35	32	33	40	49	35	50	52		511
Mean	0	0	0	0	0	0	0	2	3.5	6.4	9.5	13.5	12.3	12.3	19.4	24.5	28.5	31.7	35.1	35.2	39	42.4	49.1	47.5	54.1	55.3		521.3
SEM	0	0	0	0	0	0	0	0.394405	0.654047	1.25786	1.85742	2.48663	2.65853	2.68349	4.37975	3.86221	3.8823	4.24801	4.33192	4.10366	4.69988	4.65522	4.9429	5.55428	5.08035	5.26635		53.5546
Count	10	10	10	10	10	10	10	10	10	10	10	10	10	10	10	10	10	10	10	10	10	10	10	10	10	10		10
Current evoked firing. Number of action potentials evoked at each injected current.
	Male AIE Saline
	-100	-80	-60	-40	-20	0	20	40	60	80	100	120	140	160	180	200	220	240	260	280	300	320	340	360	380	400		Cumulative
	0	0	0	0	0	0	0	3	5	10	13	15	27	20	20	21	27	28	32	32	37	37	44	49	51	52		523
	0	0	0	0	0	0	0	5	15	11	29	17	19	21	35	22	36	25	22	12	27	21	21	20	23	16		397
	0	0	0	0	0	0	0	3	5	6	8	3	8	12	9	10	10	13	15	9	11	12	16	15	15	15		195
	0	0	0	0	0	0	0	1	1	3	4	3	1	17	24	18	21	18	20	19	23	19	22	25	26	26		291
	0	0	0	0	0	0	0	2	3	5	5	21	15	13	26	30	36	39	30	35	31	39	45	36	46	47		504
	0	0	0	0	0	0	0	2	4	6	8	12	7	21	18	8	12	6	6	10	10	10	12	19	14	14		199
	0	0	0	0	0	0	0	6	12	20	29	27	33	20	16	18	20	24	28	27	27	32	41	32	44	46		502
	0	0	0	0	0	0	0	1	3	4	5	9	14	15	18	14	15	12	13	14	17	19	22	25	25	25		270
	0	0	0	0	0	0	0	2	4	8	10	8	19	32	32	33	35	32	35	37	40	40	44	49	50	51		561
	0	0	0	0	0	0	0	2	3	4	5	5	3	20	40	35	30	27	28	28	25	28	32	22	32	32		401
Mean	0	0	0	0	0	0	0	2.7	5.5	7.7	11.6	12	14.6	19.1	23.8	20.9	24.2	22.4	22.9	22.3	24.8	25.7	29.9	29.2	32.6	32.4		384.3
SEM	0	0	0	0	0	0	0	0.517472	1.4004	1.59896	3.02655	2.52982	3.25303	1.7792	3.02141	2.94184	3.16157	3.18748	2.95691	3.39951	3.16509	3.49619	4.04269	3.82332	4.47263	4.86986		43.5918
Count	10	10	10	10	10	10	10	10	10	10	10	10	10	10	10	10	10	10	10	10	10	10	10	10	10	10		10
	Male AIE Carrageenan
	-100	-80	-60	-40	-20	0	20	40	60	80	100	120	140	160	180	200	220	240	260	280	300	320	340	360	380	400		Cumulative
	0	0	0	0	0	0	0	0	1	4	9	15	20	23	29	29	27	20	14	9	9	7	6	6	5	5		238
	0	0	0	0	0	0	0	0	0	0	0	0	1	5	25	34	33	43	47	45	38	52	59	27	52	54		515
	0	0	0	0	0	0	0	2	4	6	12	18	26	23	17	22	30	32	35	38	46	48	55	68	63	65		610
	0	0	0	0	0	0	0	5	8	13	22	20	23	31	39	34	32	32	33	36	34	38	45	38	49	50		582
	0	0	0	0	0	0	0	2	3	7	6	10	9	5	16	20	23	23	26	27	31	30	34	41	41	42		396
	0	0	0	0	0	0	0	3	5	6	9	9	14	32	38	30	24	20	20	21	20	19	21	19	24	23		357
	0	0	0	0	0	0	0	0	1	3	4	12	17	17	5	14	19	22	23	27	32	33	37	46	42	43		397
	0	0	0	0	0	0	0	3	6	9	14	10	9	32	33	32	39	34	36	41	48	43	47	67	59	59		621
	0	0	0	0	0	0	0	4	6	12	16	9	18	5	5	6	9	9	10	12	14	13	14	18	16	17		213
	0	0	0	0	0	0	0	1	2	5	7	16	11	28	32	39	37	37	40	42	41	46	52	48	57	58		599
Mean	0	0	0	0	0	0	0	2	3.6	6.5	9.9	11.9	14.8	20.1	23.9	26	27.3	27.2	28.4	29.8	31.3	32.9	37	37.8	40.8	41.6		452.8
SEM	0	0	0	0	0	0	0	0.557773	0.832666	1.25831	2.00804	1.81016	2.37487	3.61309	3.98176	3.25576	2.84038	3.19305	3.73333	4.01884	4.17146	4.9	5.72713	6.5146	6.2	6.35645		48.7738
Count	10	10	10	10	10	10	10	10	10	10	10	10	10	10	10	10	10	10	10	10	10	10	10	10	10	10		10
