# Supplementary material for: Adolescent alcohol exposure promotes mechanical allodynia and alters synaptic function at inputs from the basolateral amygdala to the prelimbic cortex
Source: eLife. 2025 May 8;13:RP101667. doi: 10.7554/eLife.101667 (PMC12061479; doi:10.7554/eLife.101667)
Supplement: Figure 9—source data 1. [file elife-101667-fig9-data1.xlsx]

## Sheet: Figure 9
BLA-driven oEPSCs and oIPSCs onto PrL PVINs.
	oEPSC Amplitude (pA) - These are absolute values									oIPSC Amplitude (pA)									E/I Ratio
	Female				Male					Female				Male					Female				Male
	Air		AIE		Air		AIE			Air		AIE		Air		AIE			Air		AIE		Air		AIE
	Saline	Carr	Saline	Carr	Saline	Carr	Saline	Carr		Saline	Carr	Saline	Carr	Saline	Carr	Saline	Carr		Saline	Carr	Saline	Carr	Saline	Carr	Saline	Carr
	342.23	261.77	125.28	198.77	257.27	399.67	172.15	161.59		209.118	79.2902	88.2803	77.9235	185.236	148.401	268.354	127.757		1.63654	3.30142	1.41912	2.55084	1.38888	2.69318	0.641503	1.26482
	329.96	123.74	353.61	174.79	137.11	248.67	152.68	150.42		203.074	60.5427	264.557	78.2187	106.731	111.406	261.411	117.169		1.62483	2.04385	1.33661	2.23463	1.28463	2.23211	0.584061	1.28379
	472.17	309.41	280.8	236.76	216.48	327.43	125.19	239.03		312.557	161.88	207.499	123.112	174.979	185.043	237.348	218.518		1.51067	1.91135	1.35326	1.92313	1.23718	1.76948	0.527453	1.09387
	337.4	424.84	145.25	332.63	334.72	389.95	125.23	145.93		224.889	274.935	106.009	181.06	259.386	238.493	235.178	135.352		1.5003	1.54524	1.37017	1.83713	1.29043	1.63506	0.53249	1.07815
	203.16	331.84	242.64	406.91	373.54	385.55	124.85	220.94		139.508	246.639	187.644	235.583	278.275	270.839	237.315	201.858		1.45626	1.34545	1.29309	1.72725	1.34234	1.42354	0.526094	1.09453
	255.04	293.31	233.37	213.6	192.89	227.57	201.359	246.99		175.086	211.53	210.025	135.545	99.1541	113.839	308.999	207.456		1.45666	1.38661	1.11115	1.57586	1.94536	1.99905	0.651649	1.19057
	158.11	547.4	338.08	214.89	348.54	196.87	188.826	153.9		108.579	391.785	265.901	137.92	206.209	167.476	135.191	136.987		1.45617	1.39719	1.27145	1.55808	1.69023	1.17551	1.39673	1.12346
	345.35	254.61	208.85	223.11	126.11	123.66	179.727	425.91		232.583	181.652	187.468	165.449	76.4173	159.775	199.467	396.794		1.48485	1.40164	1.11406	1.34851	1.65028	0.773963	0.901036	1.07338
	385.73	274.21	277.93	239.71	306.12	186.04	187.089	147.31		278.238	192.557	271.699	213.666	213.837	250.69	202.187	161.872		1.38633	1.42405	1.02293	1.12189	1.43156	0.742112	0.925327	0.91004
	320.44	477.89	125.33	145.79	161.07	168.43	177.361	254.74		244.505	322.202	118.091	284.19	119.358	302.487	211.032	372.982		1.31057	1.4832	1.0613	0.513002	1.34947	0.556817	0.840446	0.682982
Mean	314.959	329.902	233.114	238.696	245.385	265.384	163.446	214.676		212.814	212.301	190.717	163.267	171.958	194.845	229.648	207.675		1.48232	1.724	1.23531	1.63903	1.46103	1.50008	0.75268	1.07956
SEM	28.4489	38.8583	26.1332	24.238	28.9685	32.3219	9.25235	27.4482		19.3047	32.316	21.4167	21.1486	21.9871	21.1192	14.8646	31.6487		0.0309048	0.190712	0.045496	0.180868	0.0719457	0.221154	0.0866588	0.0554538
Count	10	10	10	10	10	10	10	10		10	10	10	10	10	10	10	10		10	10	10	10	10	10	10	10
