# Supplementary material for: Adolescent alcohol exposure promotes mechanical allodynia and alters synaptic function at inputs from the basolateral amygdala to the prelimbic cortex
Source: eLife. 2025 May 8;13:RP101667. doi: 10.7554/eLife.101667 (PMC12061479; doi:10.7554/eLife.101667)
Supplement: Figure 10—source data 1. [file elife-101667-fig10-data1.xlsx]

## Sheet: Figure 10
Monosynaptic AMPA and NMDA currents at BLA inputs onto PrL PVINs.
	AMPA Amplitude (pA)									NMDA Amplitude (pA)									AMPA/NMDA Ratio									Rectification Index
	Female				Male					Female				Male					Female				Male					Female				Male
	Air		AIE		Air		AIE			Air		AIE		Air		AIE			Air		AIE		Air		AIE			Air		AIE		Air		AIE
	Saline	Carr	Saline	Carr	Saline	Carr	Saline	Carr		Saline	Carr	Saline	Carr	Saline	Carr	Saline	Carr		Saline	Carr	Saline	Carr	Saline	Carr	Saline	Carr		Saline	Carr	Saline	Carr	Saline	Carr	Saline	Carr
	240.37	536.256	410.222	317.873	285.546	736.923	79.2055	428.204		98.2201	108.821	96.811	90.8171	119.104	116.444	38.6706	198.627		2.44726	4.92787	4.23735	3.50014	2.39745	6.32856	2.04821	2.15582		0.320563	0.200341	0.263964	0.258748	0.393309	0.179496	0.376646	0.209015
	281.075	401.305	175.972	772.971	297.133	732.794	311.952	322.282		110.447	146.659	78.5112	126.143	164.811	133.996	98.4349	138.057		2.54489	2.73631	2.24136	6.12774	1.80287	5.46878	3.16912	2.33441		0.269811	0.253052	0.46452	0.131018	0.402342	0.198157	0.201655	0.101829
	223.057	309.855	319.286	290.69	626.06	732.108	260.058	332.951		112.679	72.494	97.6388	130.173	156.702	154.955	92.1152	188.055		1.97958	4.27422	3.27007	2.23311	3.99523	4.72465	2.82318	1.7705		0.331513	0.190374	0.262142	0.37433	0.168027	0.212925	0.179682	0.168619
	399.491	938.724	236.52	276.589	244.4	469.122	818.583	512.39		159.211	191.96	82.082	64.9641	140.836	86.4422	260.18	287.332		2.50919	4.89021	2.88151	4.25757	1.73535	5.427	3.14622	1.78327		0.250734	0.165322	0.257433	0.281971	0.371066	0.175675	0.15518	0.117471
	295.422	729.579	578.308	232.952	247.705	525.586	351.247	203.246		191.521	152.92	159.736	96.3351	139.659	101.204	107.67	120.207		1.5425	4.77098	3.6204	2.41814	1.77364	5.19333	3.26226	1.6908		0.349886	0.168596	0.200955	0.514697	0.338457	0.169169	0.166639	0.122497
	325.55	1204.11	188.719	294.839	195.641	633.581	230.344	243.892		142.97	155.673	39.8751	170.699	56.5913	150.352	72.2136	160.772		2.27705	7.73487	4.73275	1.72725	3.45709	4.21398	3.18976	1.51701		0.220313	0.167885	0.155909	0.376776	0.305941	0.184851	0.367019	0.551678
	406.24	154.202	570.813	125.926	416.198	335.709	427.877	203.237		166.633	78.9058	121.819	41.7648	292.918	201.076	134.357	114.747		2.43793	1.95425	4.68575	3.01512	1.42087	1.66956	3.18463	1.77117		0.192938	0.455508	0.155762	0.250152	0.402496	0.398938	0.346593	0.678687
	459.095	382.003	139.951	455.766	467.432	158.818	183.194	342.443		201.381	177.009	49.344	149.378	170.874	155.68	68.7174	107.269		2.27973	2.1581	2.83623	3.05109	2.73554	1.02016	2.6659	3.19238		0.184666	0.470263	0.177893	0.232402	0.191774	0.609123	0.317305	0.343616
	422.428	167.76	280.444	442.805	278.767	523.811	334.174	303.449		158.574	88.9313	170.128	90.8923	145.131	202.978	155.009	82.8728		2.66392	1.8864	1.64843	4.87175	1.9208	2.58063	2.15584	3.66162		0.155512	0.44757	0.294212	0.154925	0.254328	0.234237	0.3102	0.399141
	691.452	367.167	338.501	852.013	682.429	415.174	110.456	265.08		239.741	136.142	194.95	148.195	204.831	259.829	43.7022	87.6983		2.88416	2.69694	1.73635	5.74927	3.33167	1.59787	2.52747	3.02264		0.134367	0.323041	0.271545	0.132239	0.104377	0.326499	0.352049	0.364783
Mean	374.418	519.096	323.874	406.242	374.131	526.363	310.709	315.717		158.138	130.952	109.09	110.936	159.146	156.296	107.107	148.564		2.35662	3.80302	3.18902	3.69512	2.45705	3.82245	2.81726	2.28996		0.24103	0.284195	0.250434	0.270726	0.293212	0.268907	0.277297	0.305734
SEM	43.4418	107.809	49.091	74.2353	53.3888	60.3564	66.0672	30.8334		14.0942	13.1623	16.3745	12.8913	19.2036	16.6471	20.5923	19.7919		0.118484	0.589011	0.357704	0.476023	0.278672	0.609105	0.142968	0.235815		0.0240125	0.0408242	0.0287078	0.0388403	0.034201	0.0445986	0.0285582	0.0625371
Count	10	10	10	10	10	10	10	10		10	10	10	10	10	10	10	10		10	10	10	10	10	10	10	10		10	10	10	10	10	10	10	10
