# Supplementary material for: Adolescent alcohol exposure promotes mechanical allodynia and alters synaptic function at inputs from the basolateral amygdala to the prelimbic cortex
Source: eLife. 2025 May 8;13:RP101667. doi: 10.7554/eLife.101667 (PMC12061479; doi:10.7554/eLife.101667)
Supplement: Figure 11—source data 1. [file elife-101667-fig11-data1.xlsx]

## Sheet: Figure 11
aEPSCs at BLA inputs onto PrL PVINs.
	aEPSC Amplitude (pA) - These are absolute values.									aEPSC Interevent Interval (ms)
	Female				Male					Female				Male
	Air		AIE		Air		AIE			Air		AIE		Air		AIE
	Saline	Carr	Saline	Carr	Saline	Carr	Saline	Carr		Saline	Carr	Saline	Carr	Saline	Carr	Saline	Carr
	8.93771	11.3888	8.97409	9.6547	8.6024	13.5159	10.2477	11.4033		10.9291	10.2156	11.3857	11.3284	13.7579	9.31667	16.5214	12.5896
	8.36021	11.4963	8.249	10.902	15.3008	10.145	11.816	12.5539		11.6549	9.29794	12.1077	10.2482	11.7667	11.7778	17.3162	12.7333
	11.0435	11.3624	9.17655	9.48759	11.551	11.1168	10.8768	14.0553		11.6766	11.4098	8.43846	11.4911	15.3419	15.6429	12.875	12.4095
	11.0261	12.9168	9.23553	10.3304	10.9637	12.2869	11.9191	11.2827		11.7862	10.255	14.3733	11.2129	10.94	13.4714	13.8625	10.6656
	11.7537	10.2177	9.24668	10.193	9.56347	9.50101	11.7841	10.4286		12.1953	9.66594	14.2625	9.31266	13.6531	11.4909	14.475	12.8976
	11.989	14.8621	10.4923	7.91207	10.4926	12.8072	9.09359	6.99448		10.2771	13.069	12.1538	10.6218	11.85	9.7	10.4	17.5375
	12.4914	10.5161	8.8206	11.6903	13.0093	10.6952	11.314	7.53644		8.62077	9.97202	9.896	12.9134	11.97	9.37	10.14	12.5615
	11.6565	10.395	9.07823	7.41711	14.6142	10.296	8.66761	7.81832		13.2204	9.09979	12.7167	13.75	12.2789	9.45652	10.4429	11.1731
	11.3911	11.7074	8.27437	9.98441	14.0637	13.0176	8.95619	7.04932		12.7652	10.0913	11.7895	12.9621	14.3412	14.8	8.1	12.1105
	9.76672	11.3574		8.90513	7.32359	9.74957	8.58756	8.88767		11.5485	14.2524		12.2583	17.96	16.9875	12.62	14.7667
Mean	10.8416	11.622	9.06082	9.64767	11.5485	11.3131	10.3263	9.801		11.4674	10.7329	11.9026	11.6099	13.386	12.2014	12.6753	12.9445
SEM	0.432673	0.435765	0.219554	0.41079	0.842385	0.465306	0.438905	0.790049		0.412097	0.533891	0.631885	0.433165	0.667201	0.906338	0.934187	0.615075
Count	10	10	9	10	10	10	10	10		10	10	9	10	10	10	10	10
